# Supplementary material for: Unprecedented β-manno type thiodisaccharides with a C-glycosylic function by photoinitiated hydrothiolation of 1-C-substituted glycals
Source: Royal Society of Chemistry journal article supplement (doi:10.1039/c6nj03751h), 2017-01-01

# Unprecedented $\beta$ -manno type thiodisaccharides with a C-glycosylic function by photoinitiated hydrothiolation of 1-C-substituted glycals

László Lázár,<sup>a</sup> László Juhász,<sup>a</sup> Gyula Batta,<sup>a</sup> Anikó Borbás<sup>b</sup> and László Somsák<sup>a,\*</sup>

<sup>a</sup>*Department of Organic Chemistry and* <sup>b</sup>*Department of Pharmaceutical Chemistry,*

*University of Debrecen, PO Box 400, H-4002*

\*Corresponding author. Tel.: +36 52512900x22348; fax: +36 52512744.

E-mail address: [somsak.laszlo@science.unideb.hu](mailto:somsak.laszlo@science.unideb.hu) (L. Somsák).

## Content

<sup>1</sup>H and <sup>13</sup>C NMR spectra (COSY, HSQC and ROESY spectra for compounds **10**, **19**, **21** and **25**)... S2

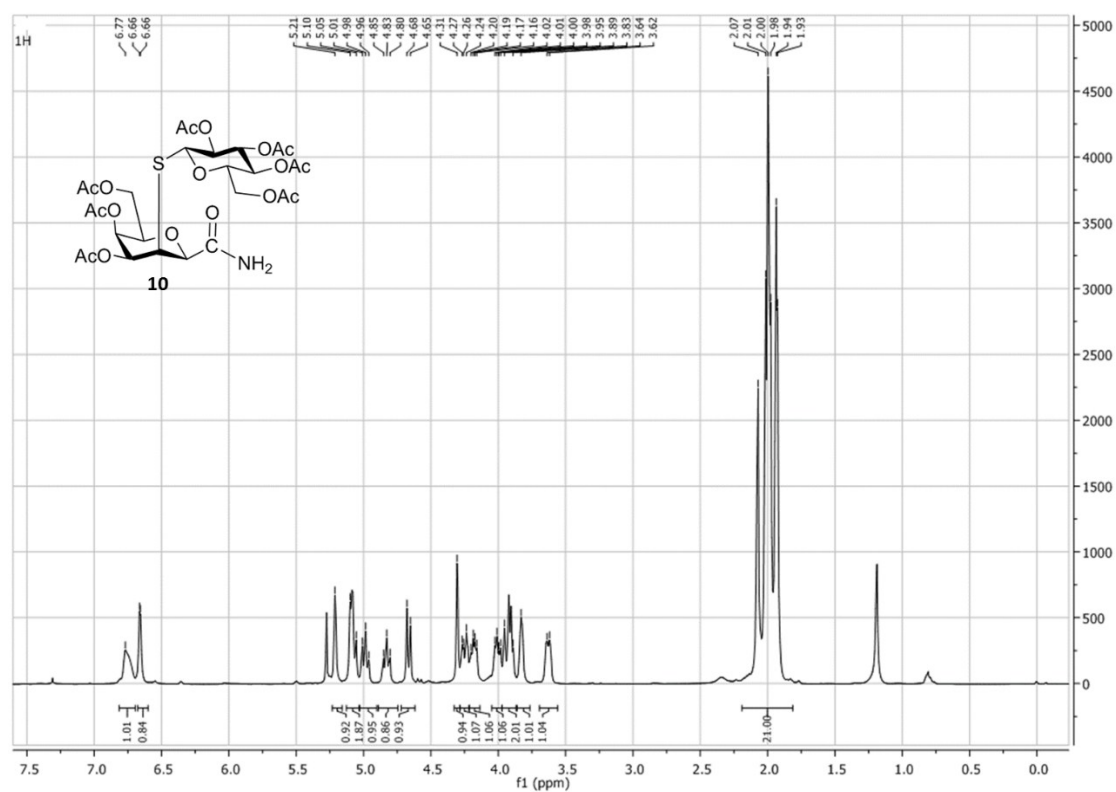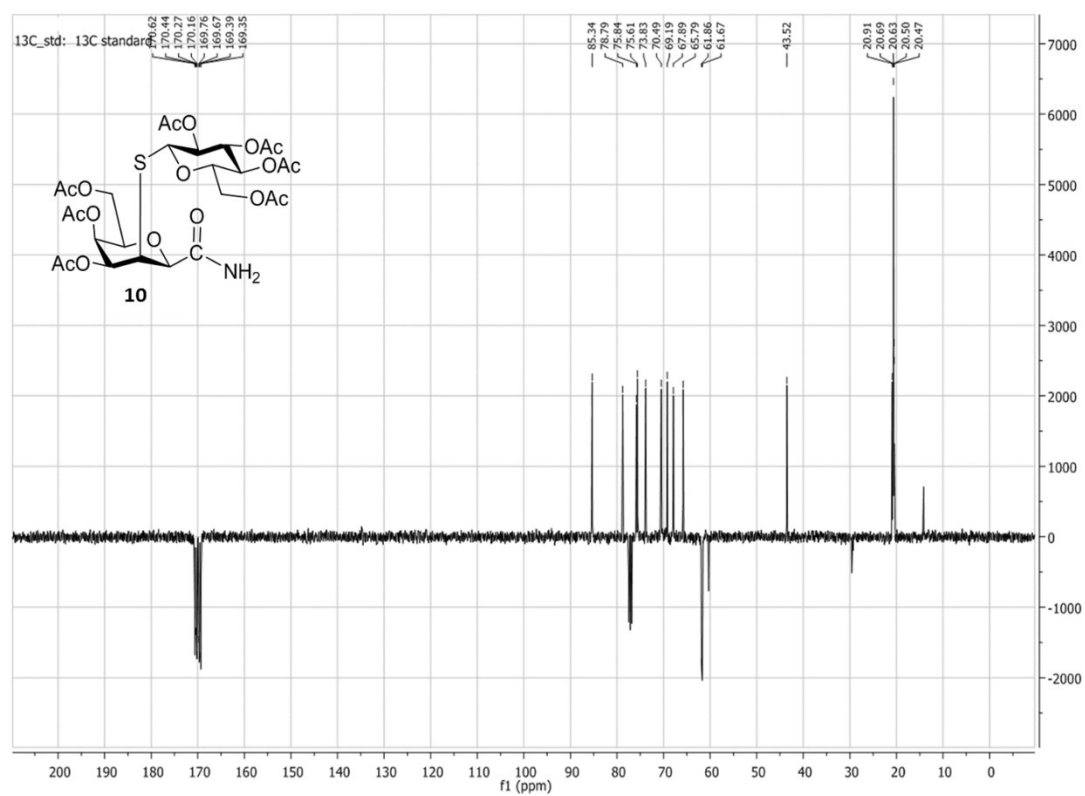

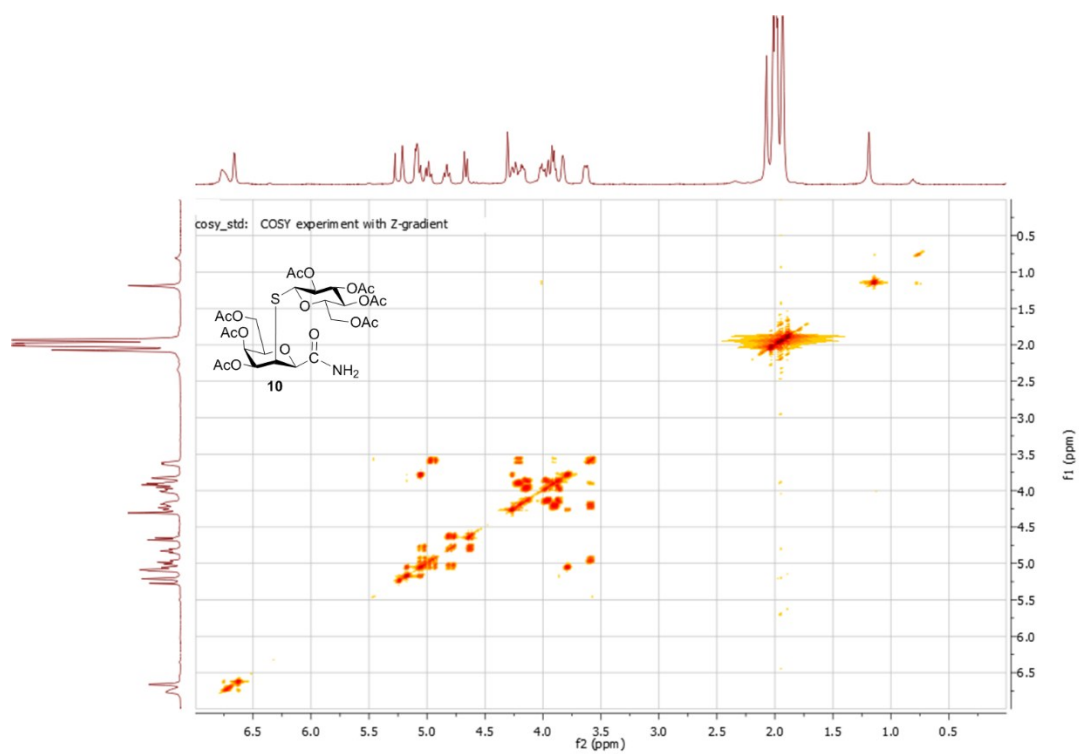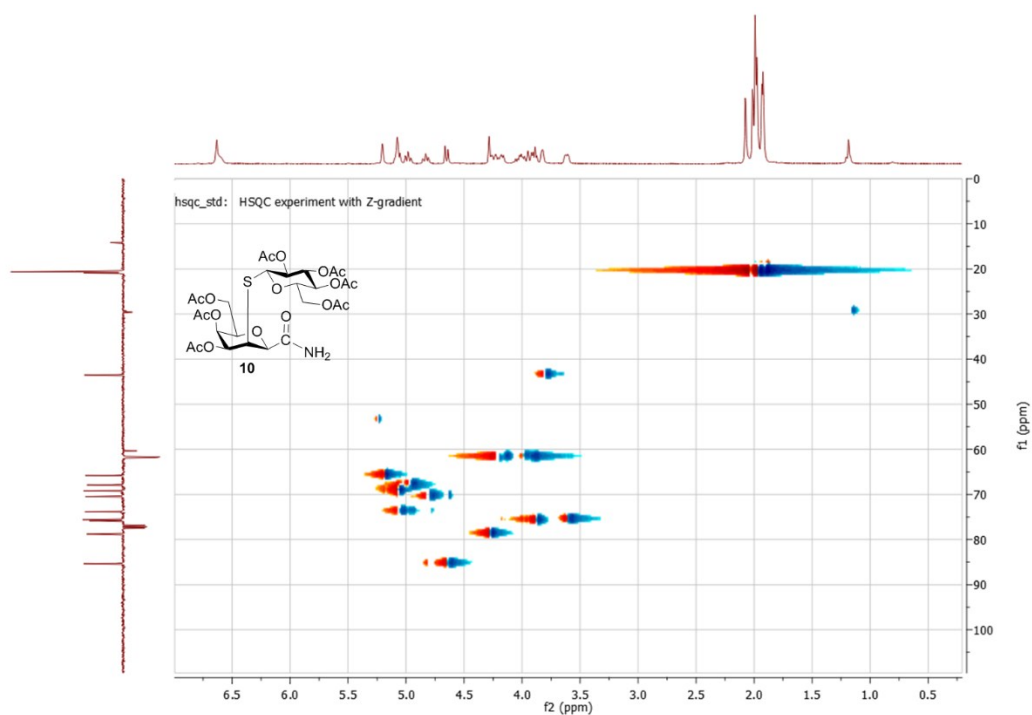

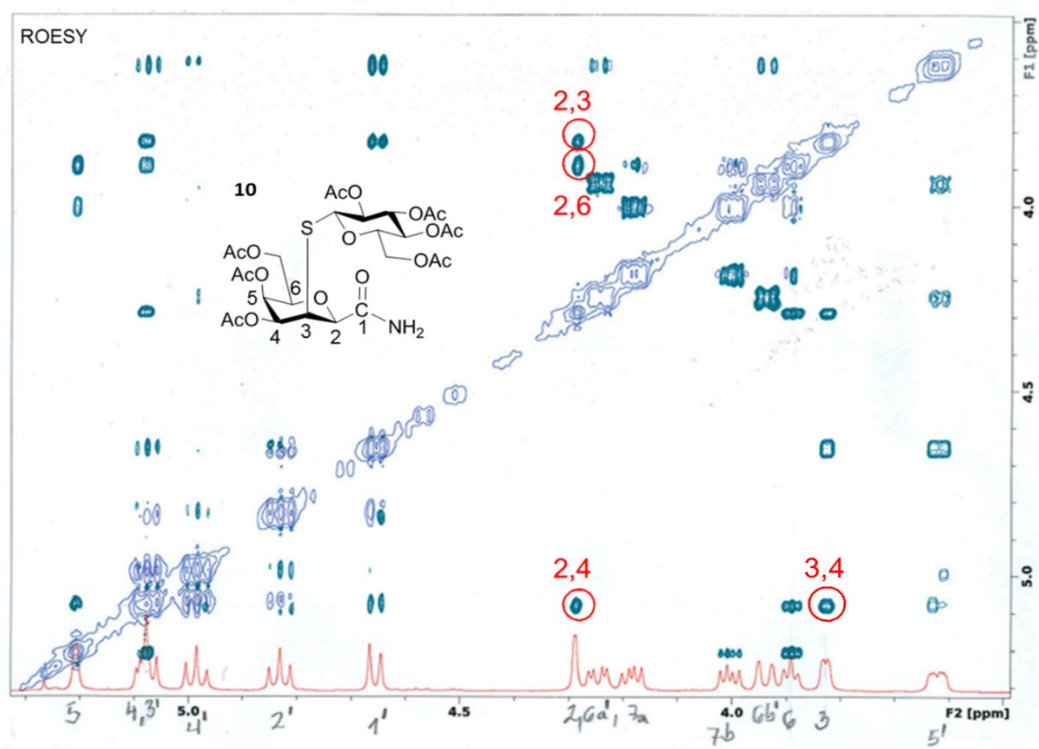

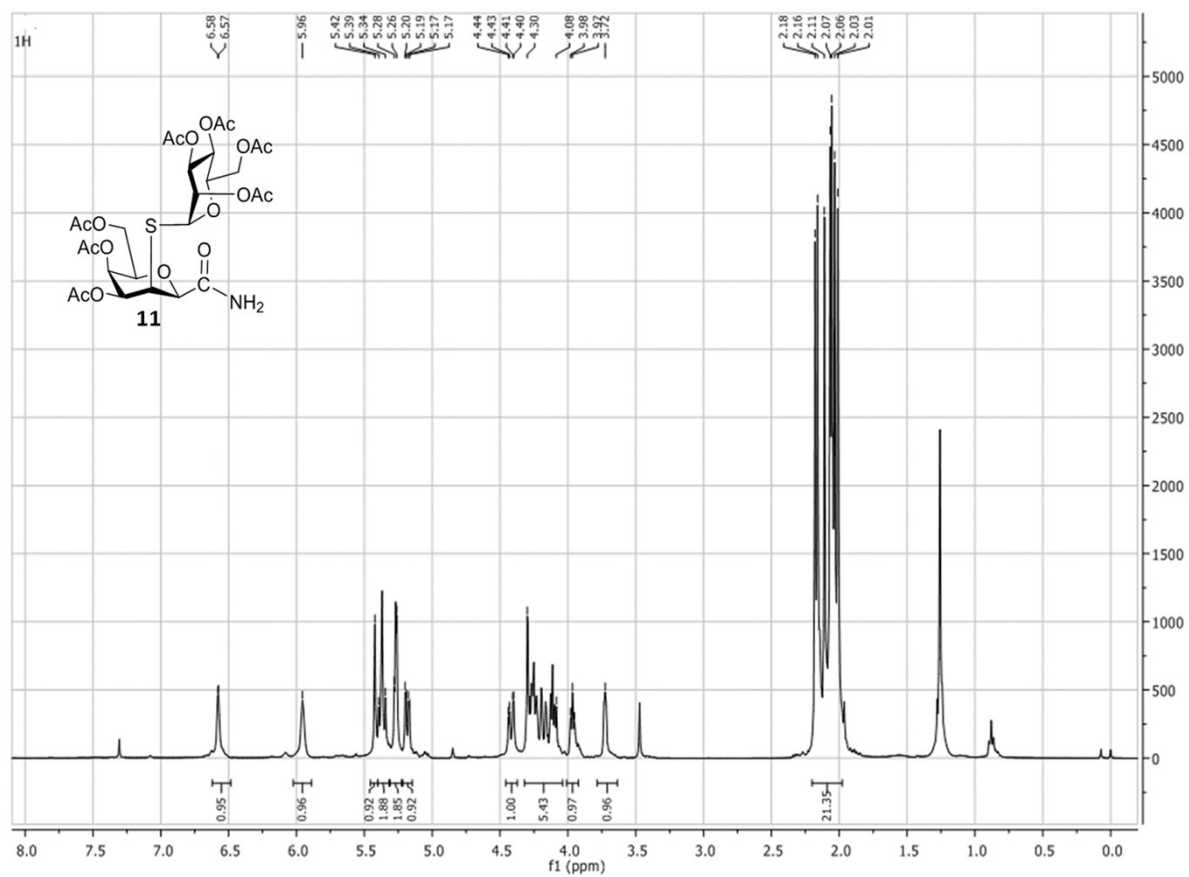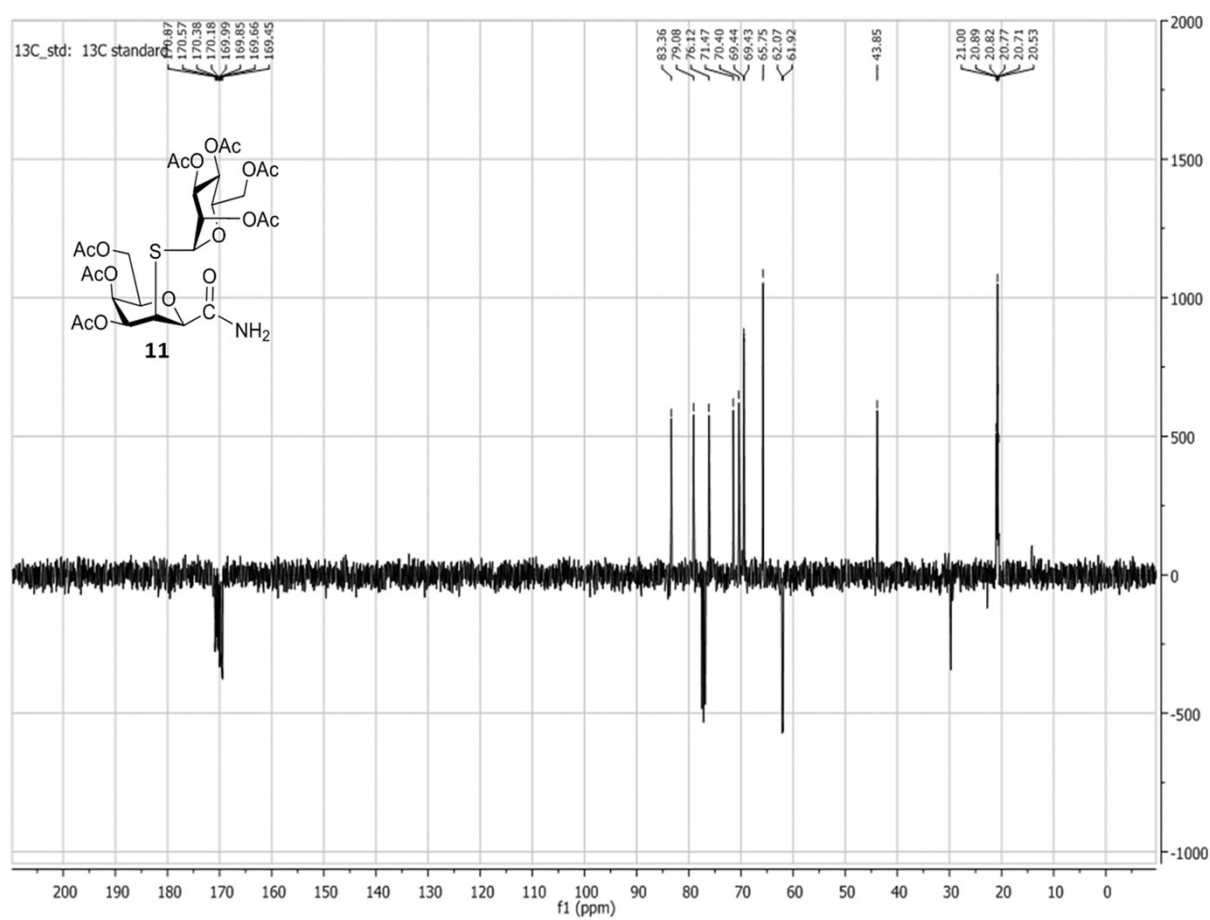

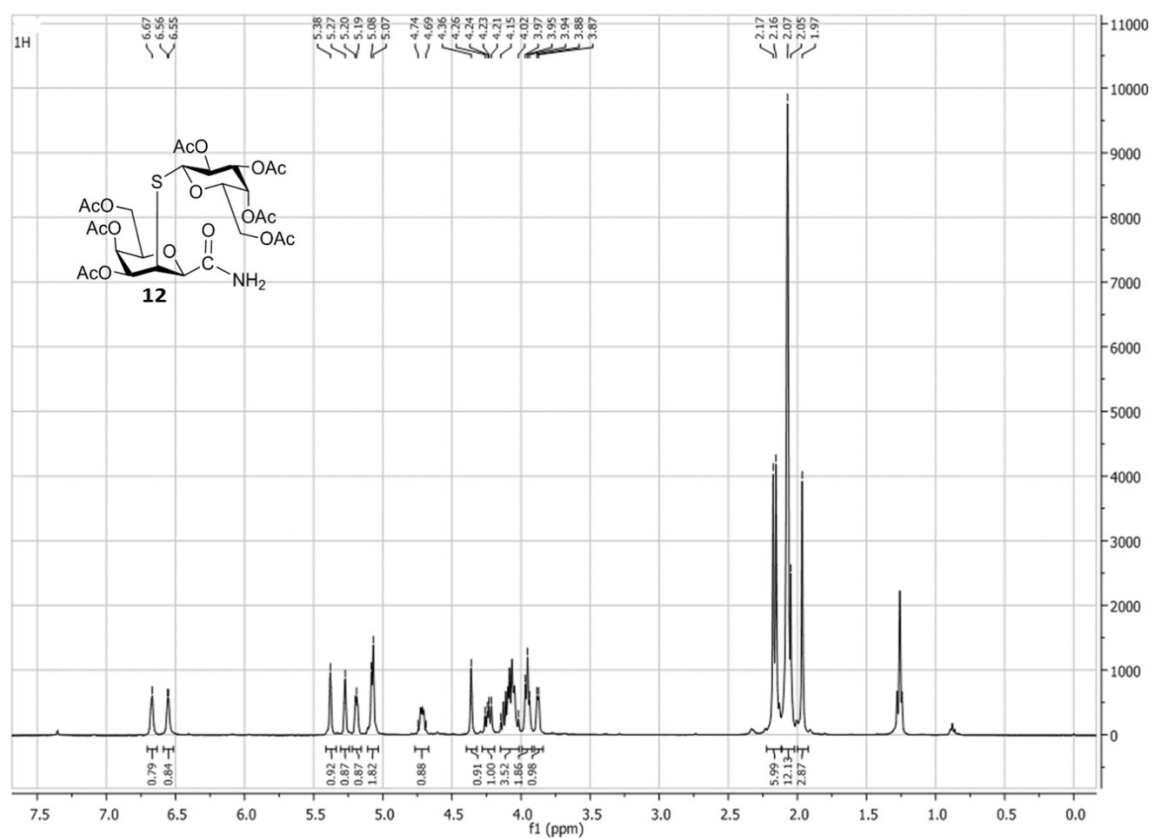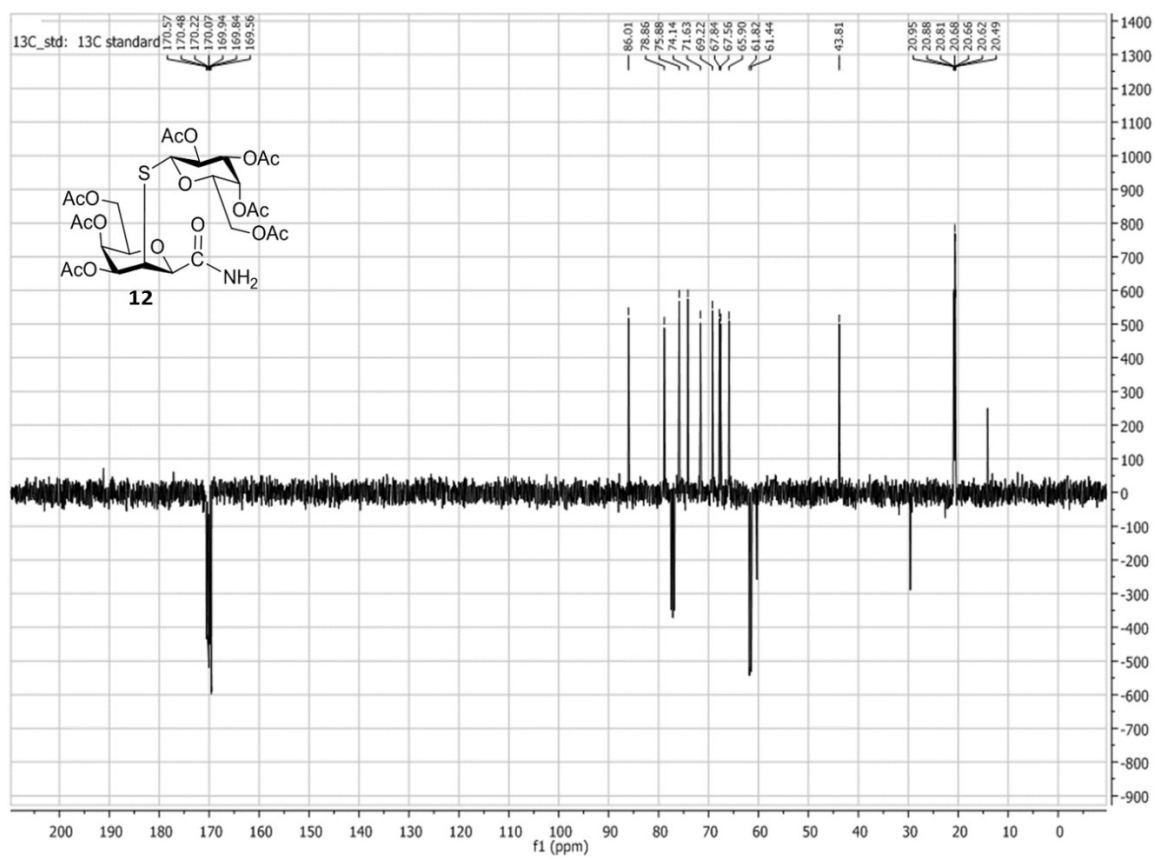

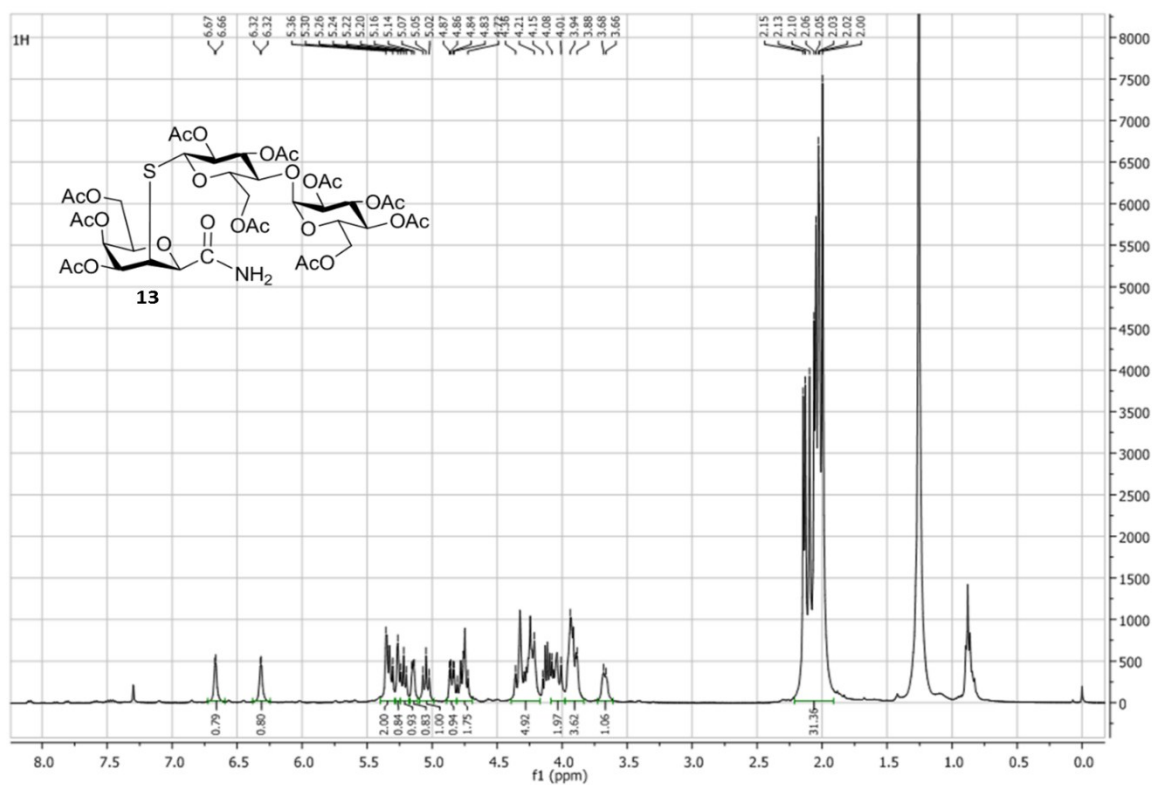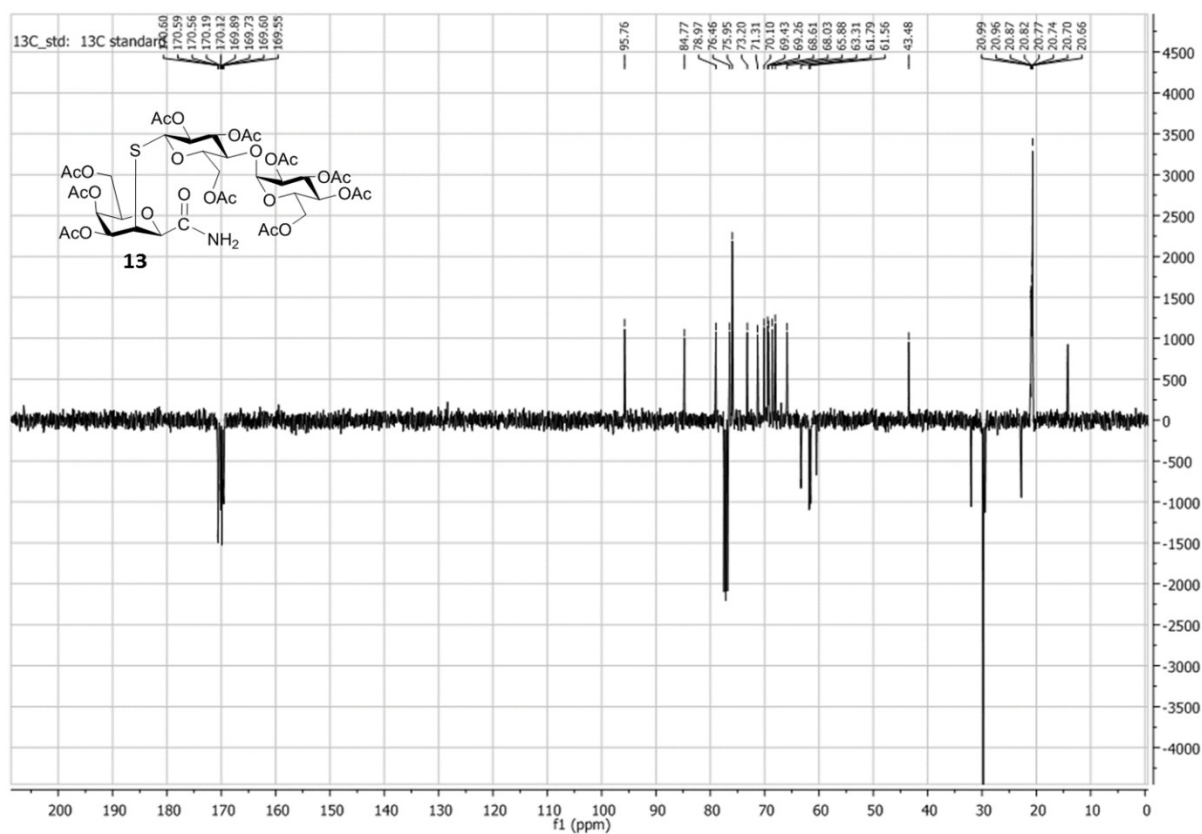

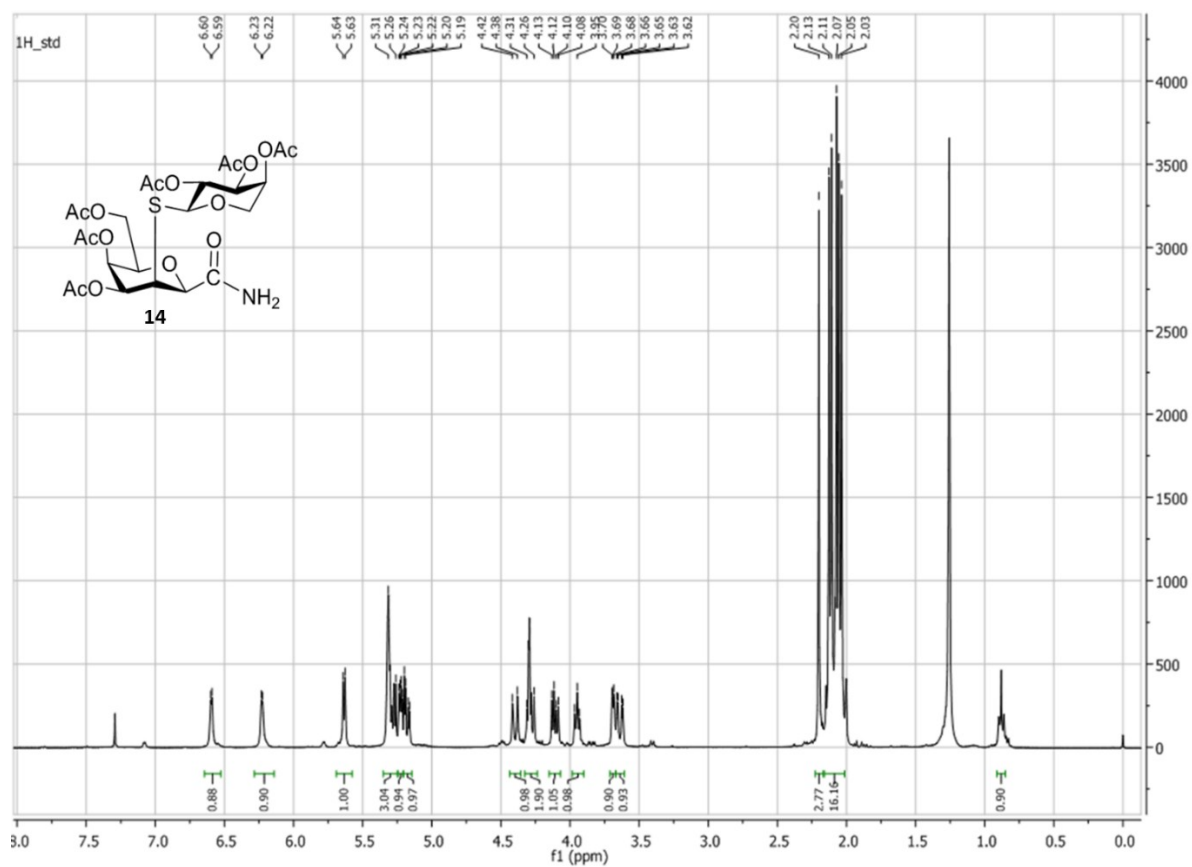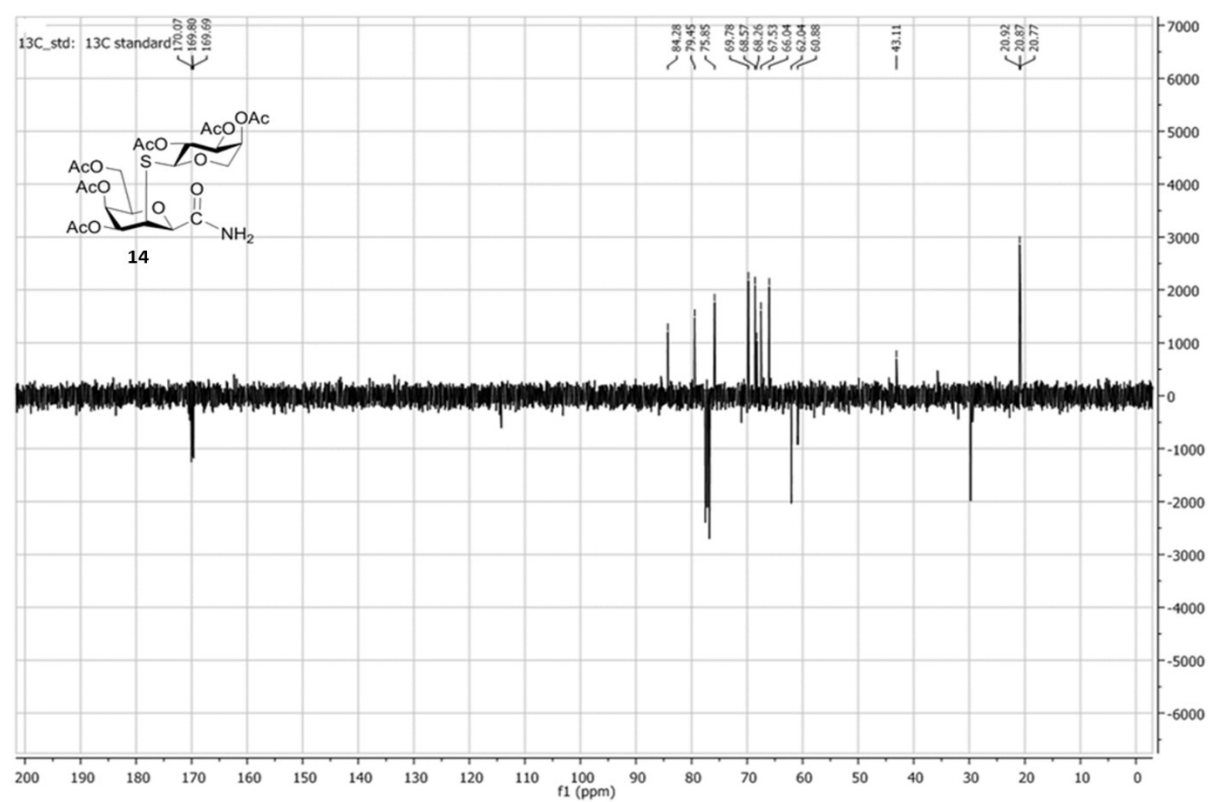



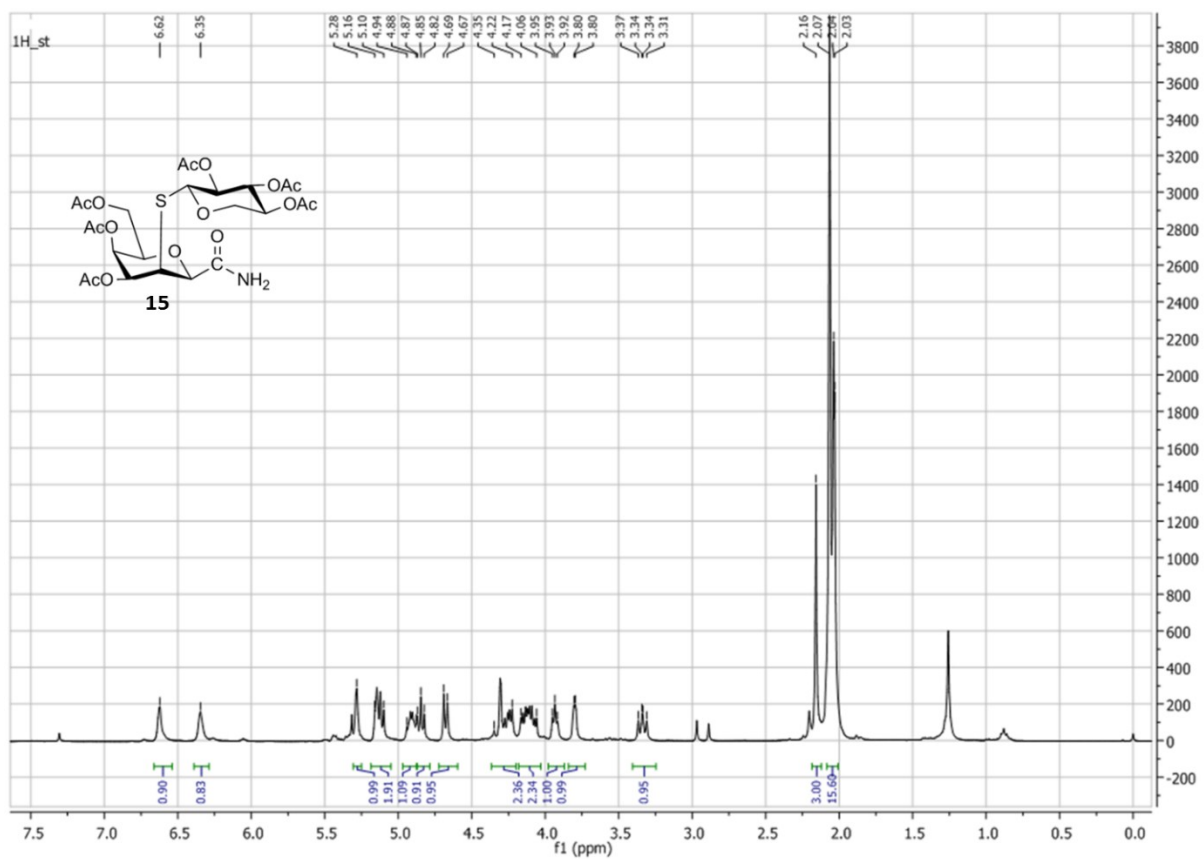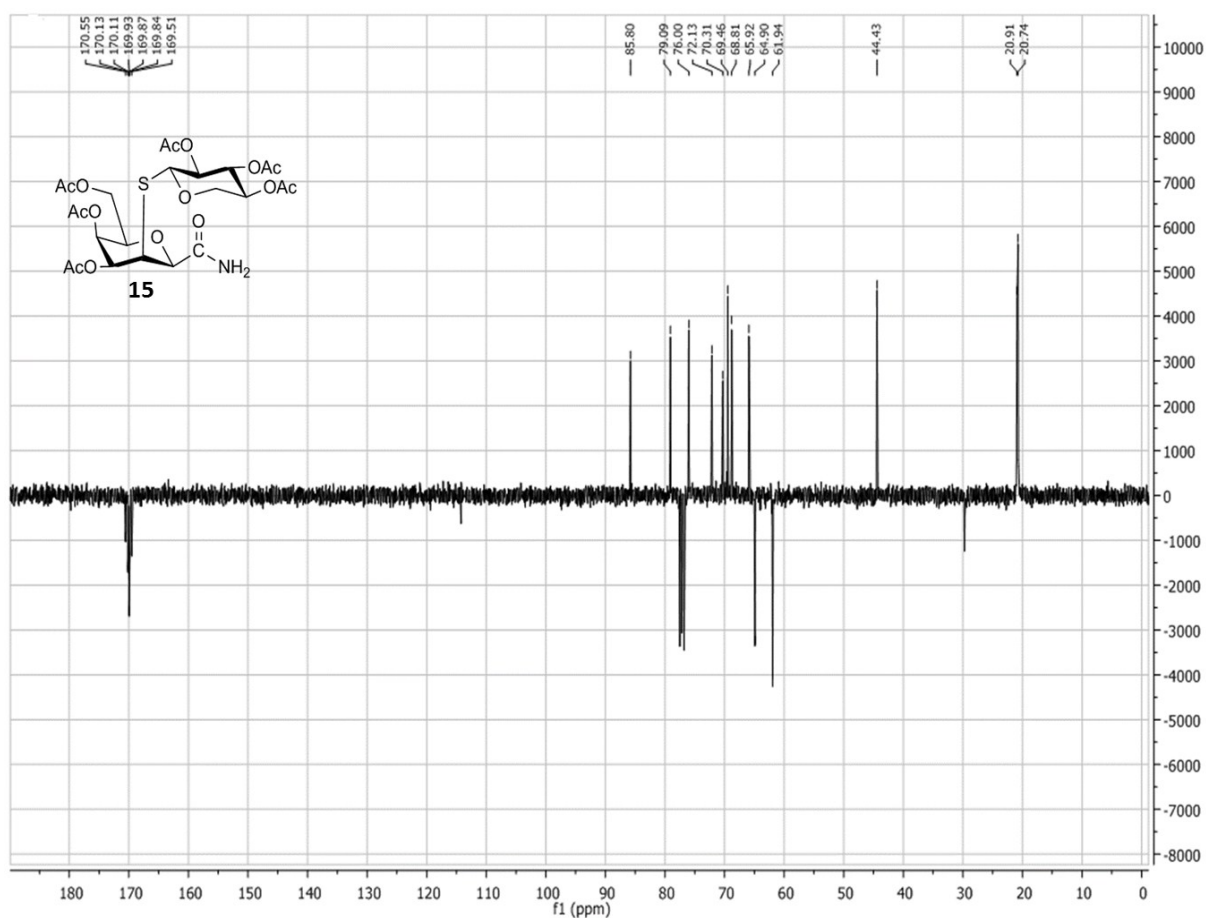

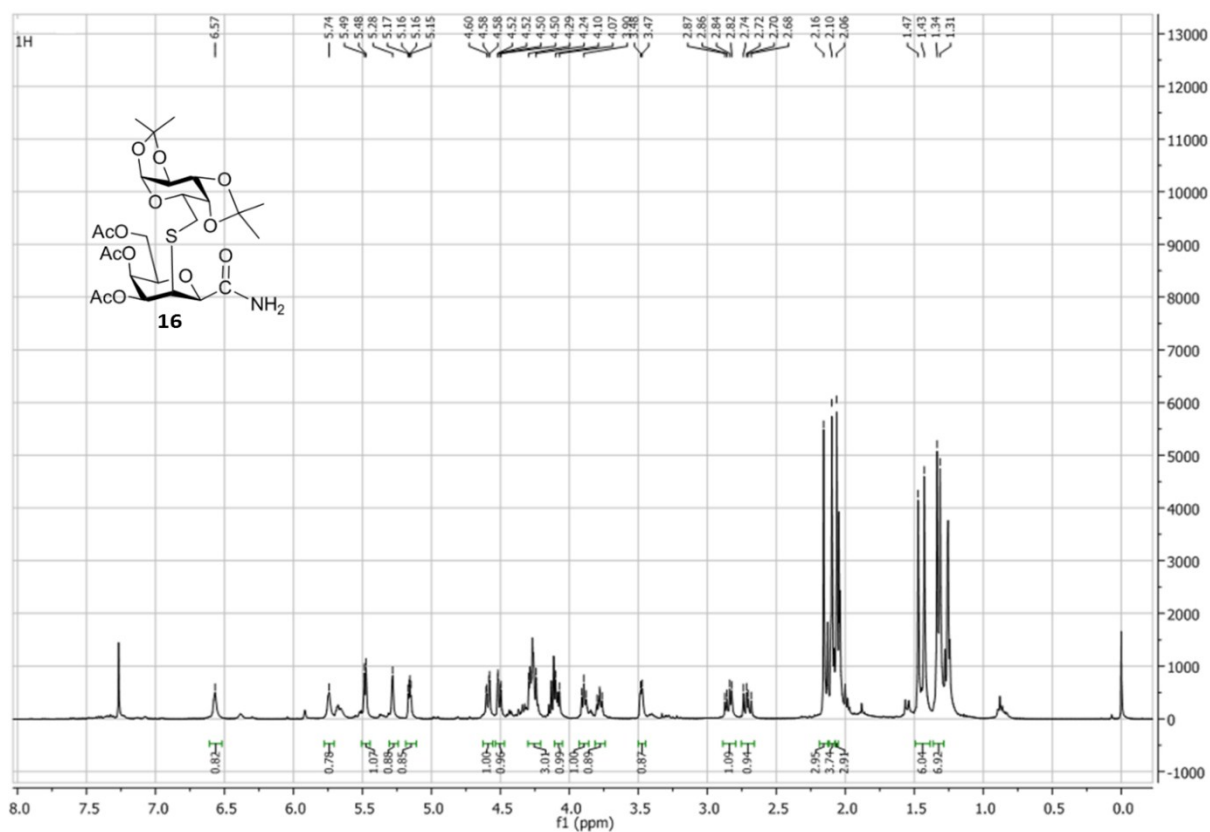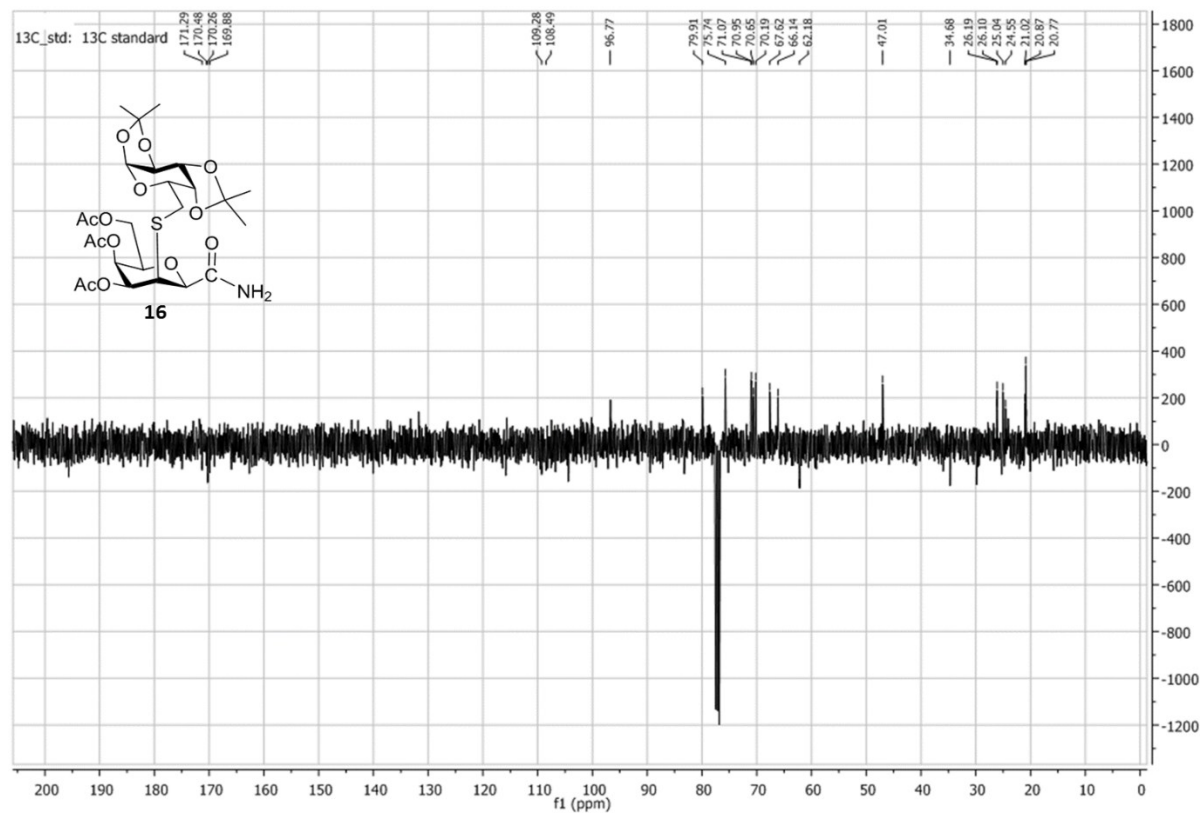

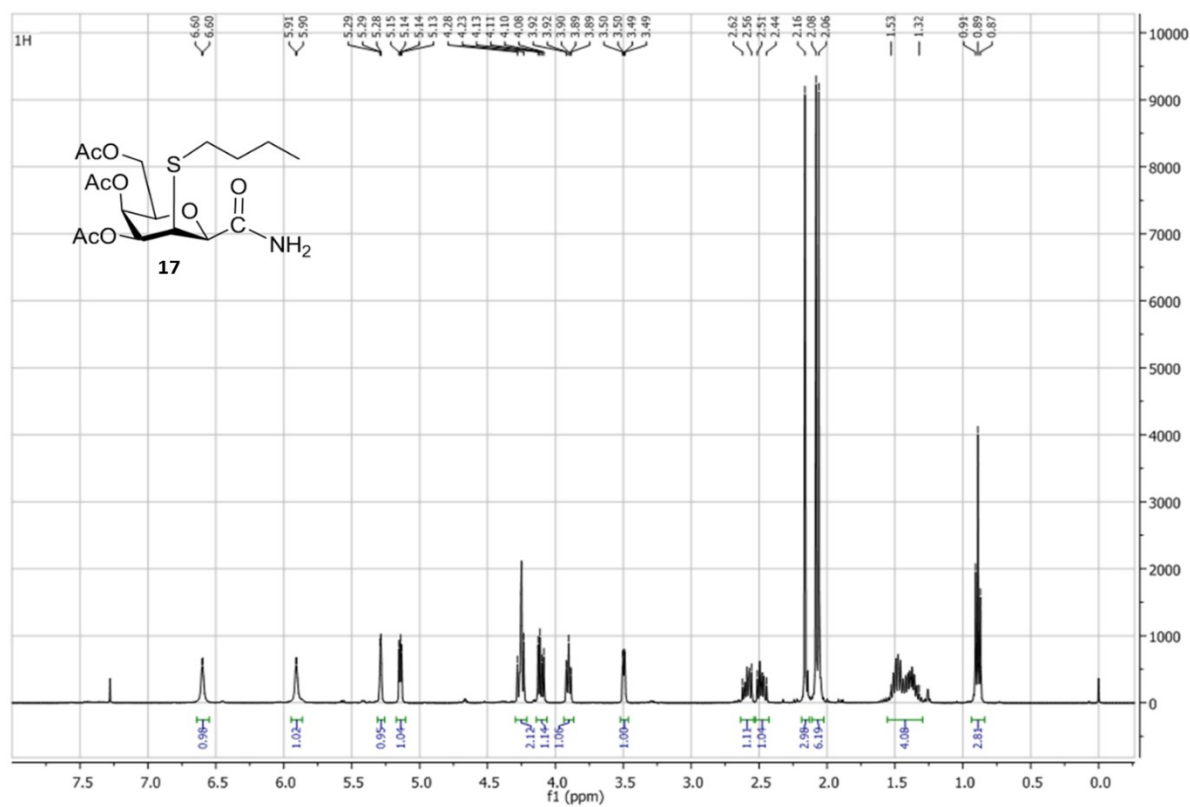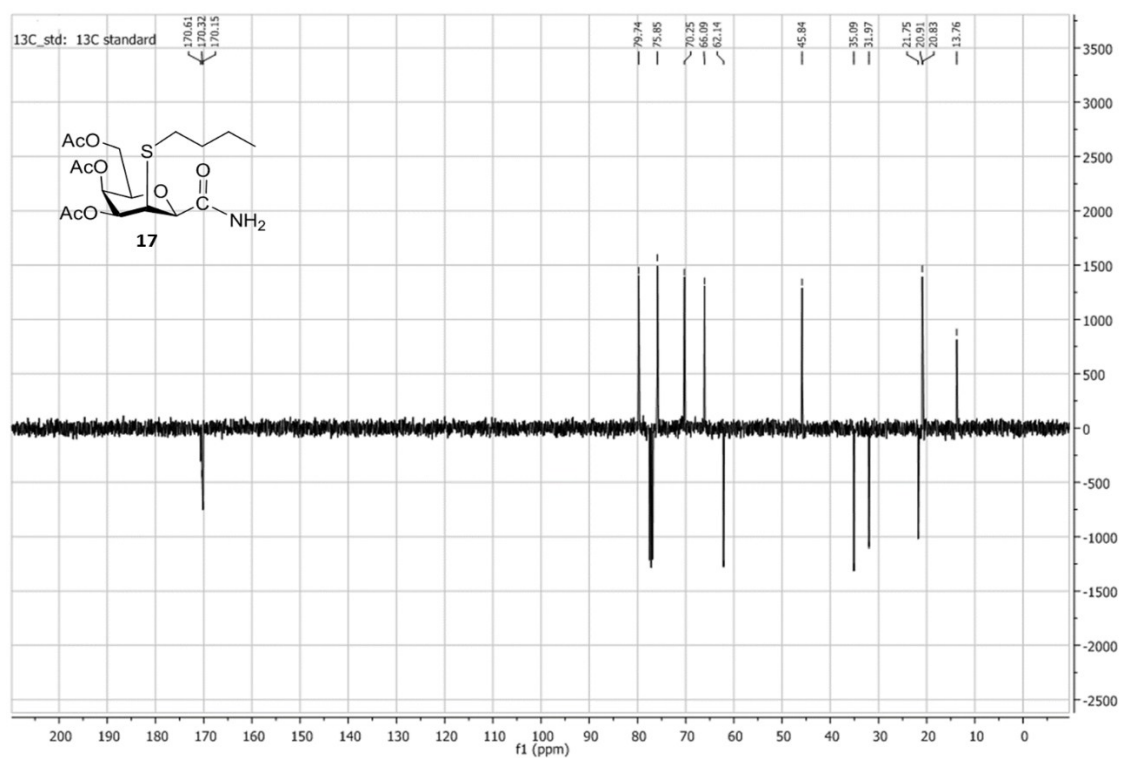

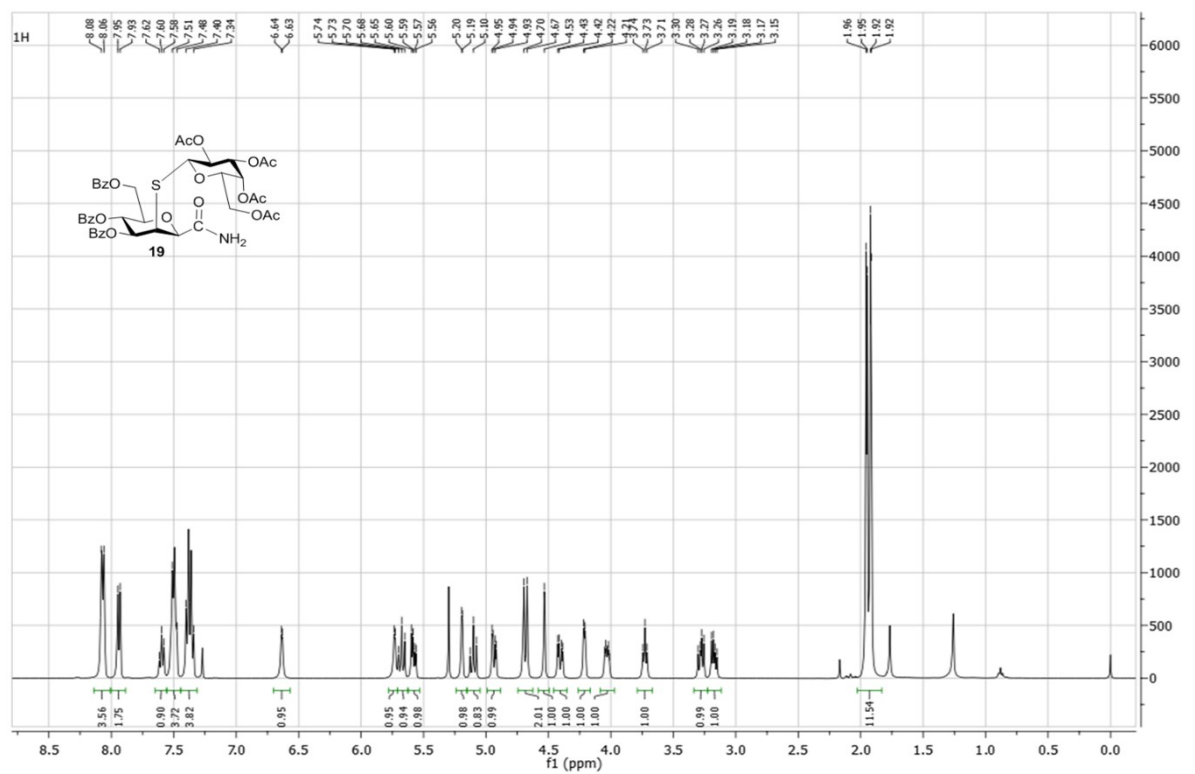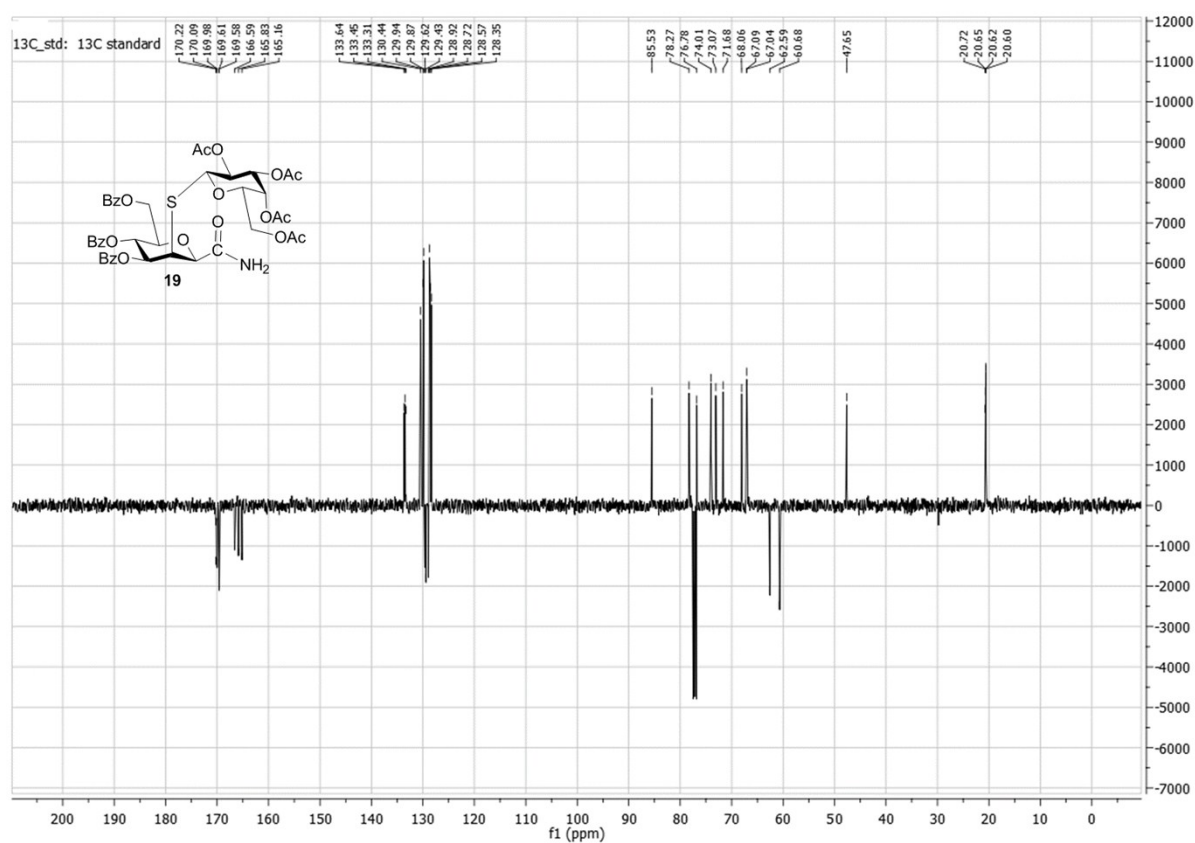

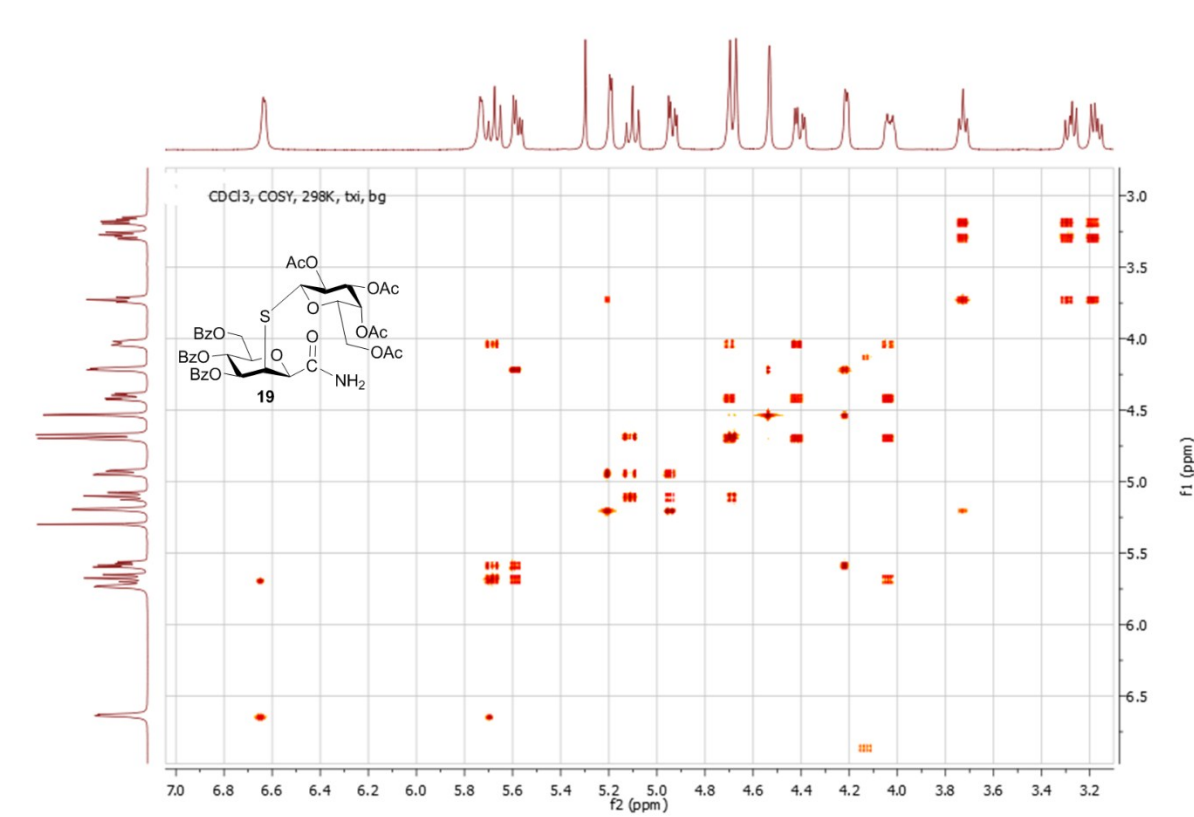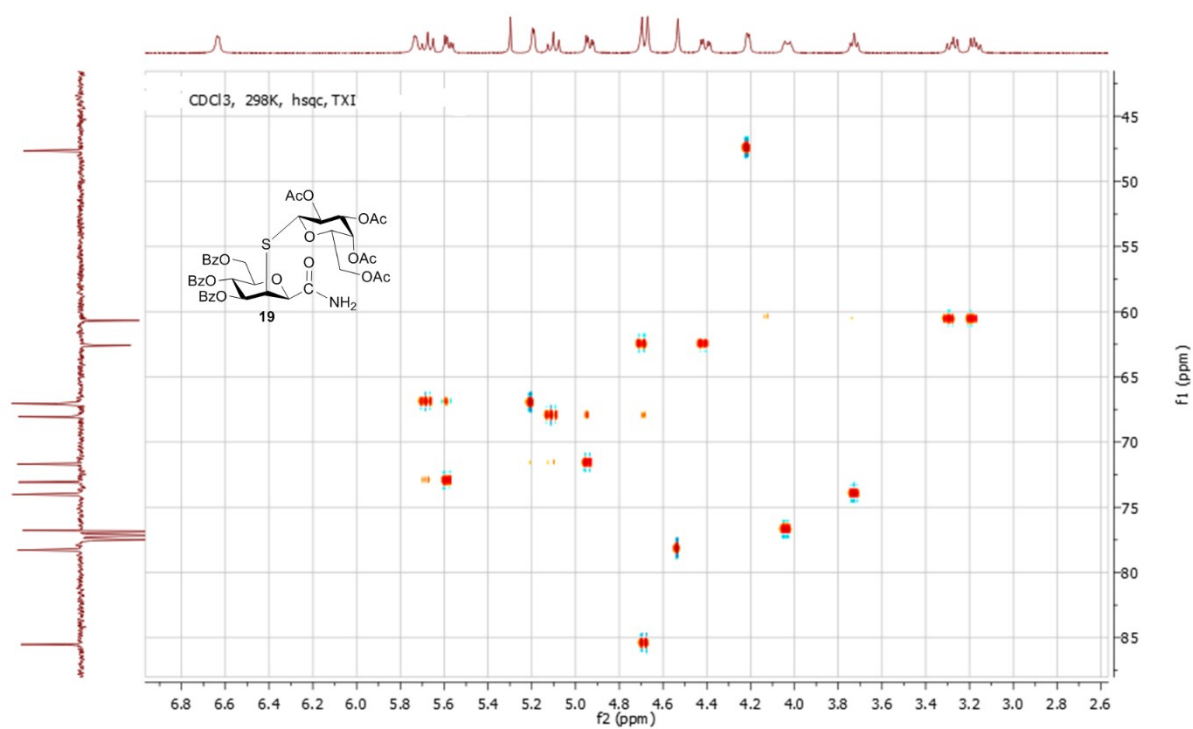

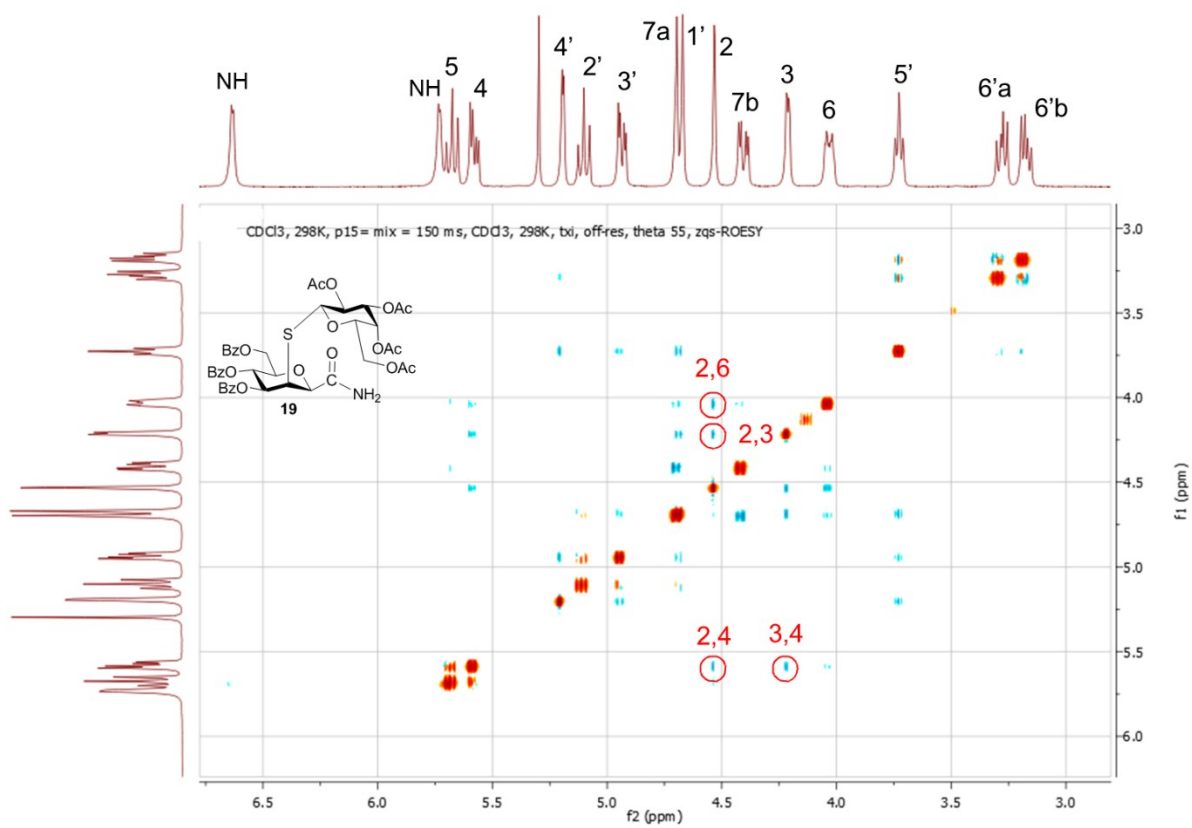

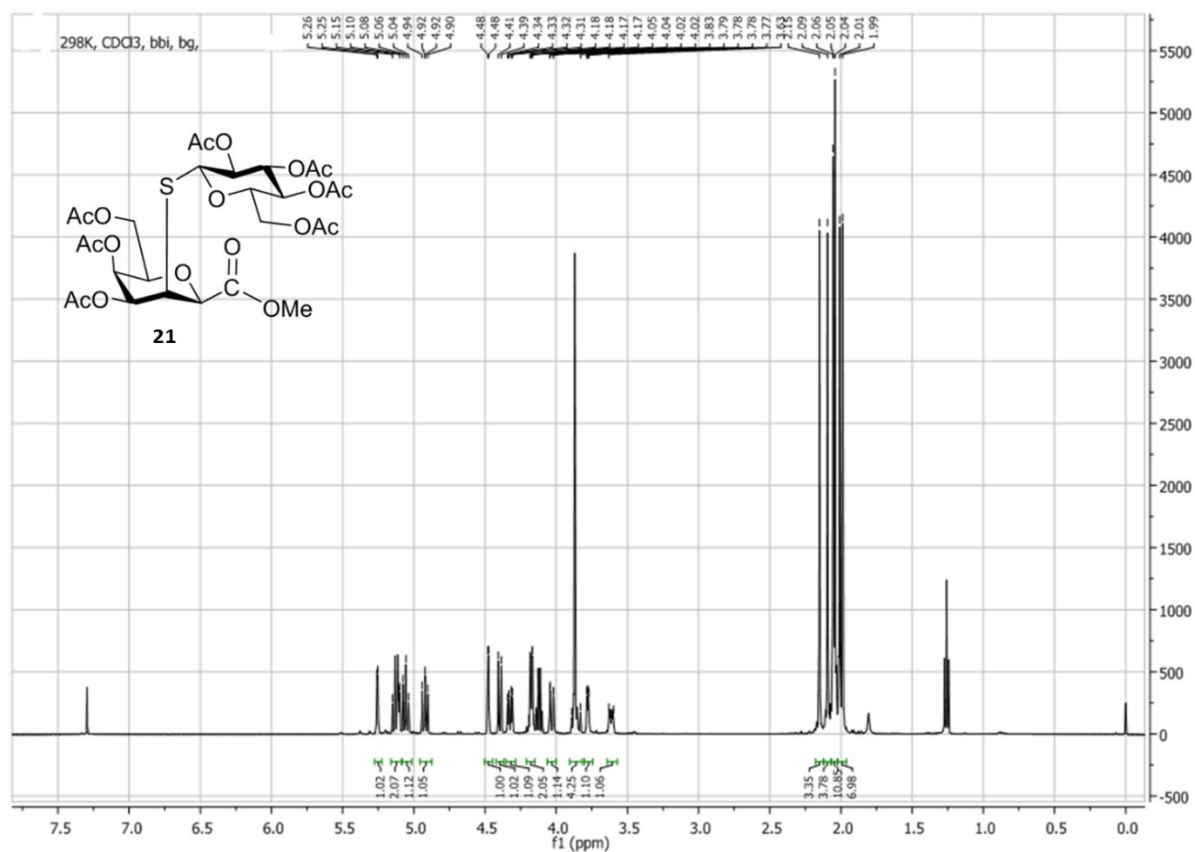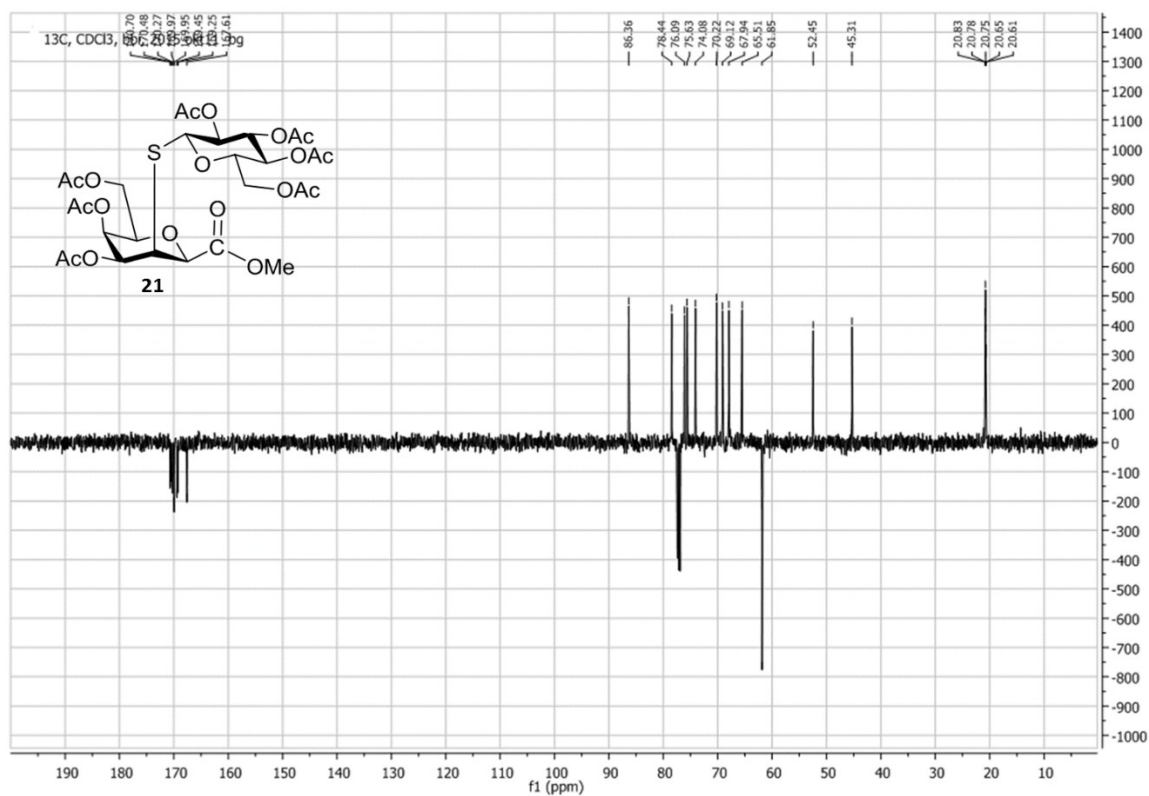



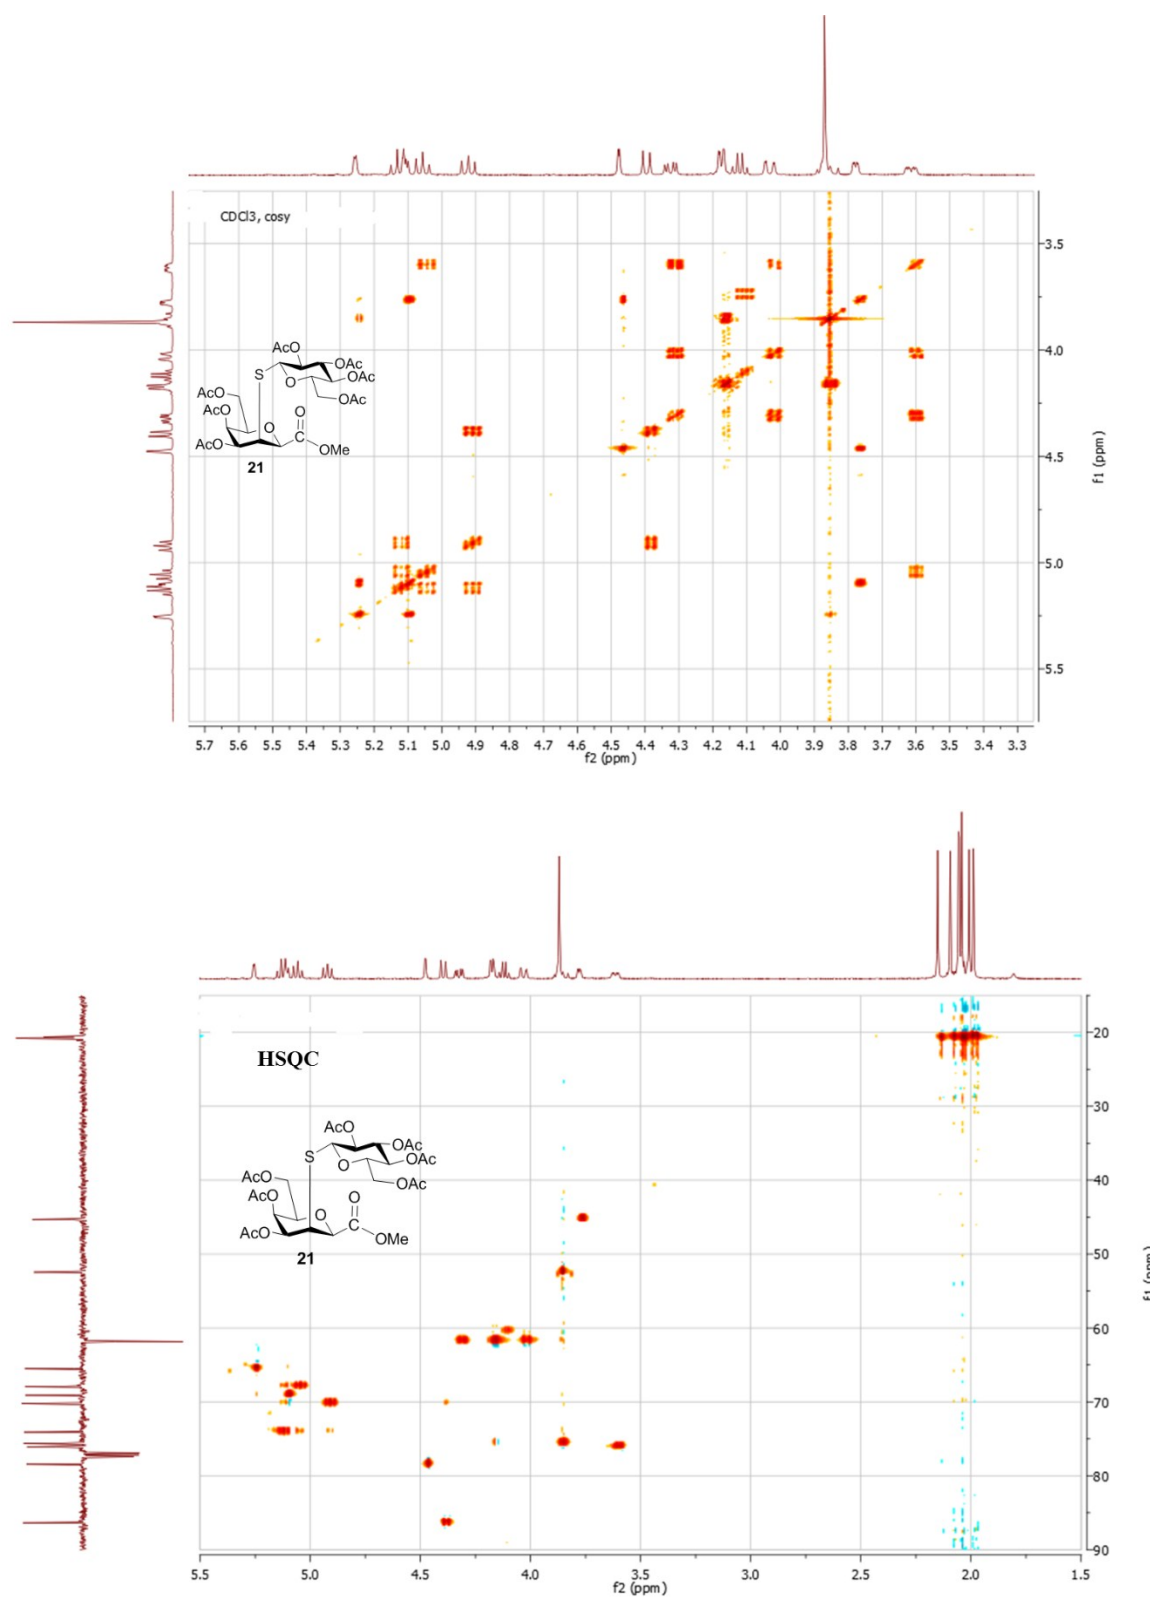



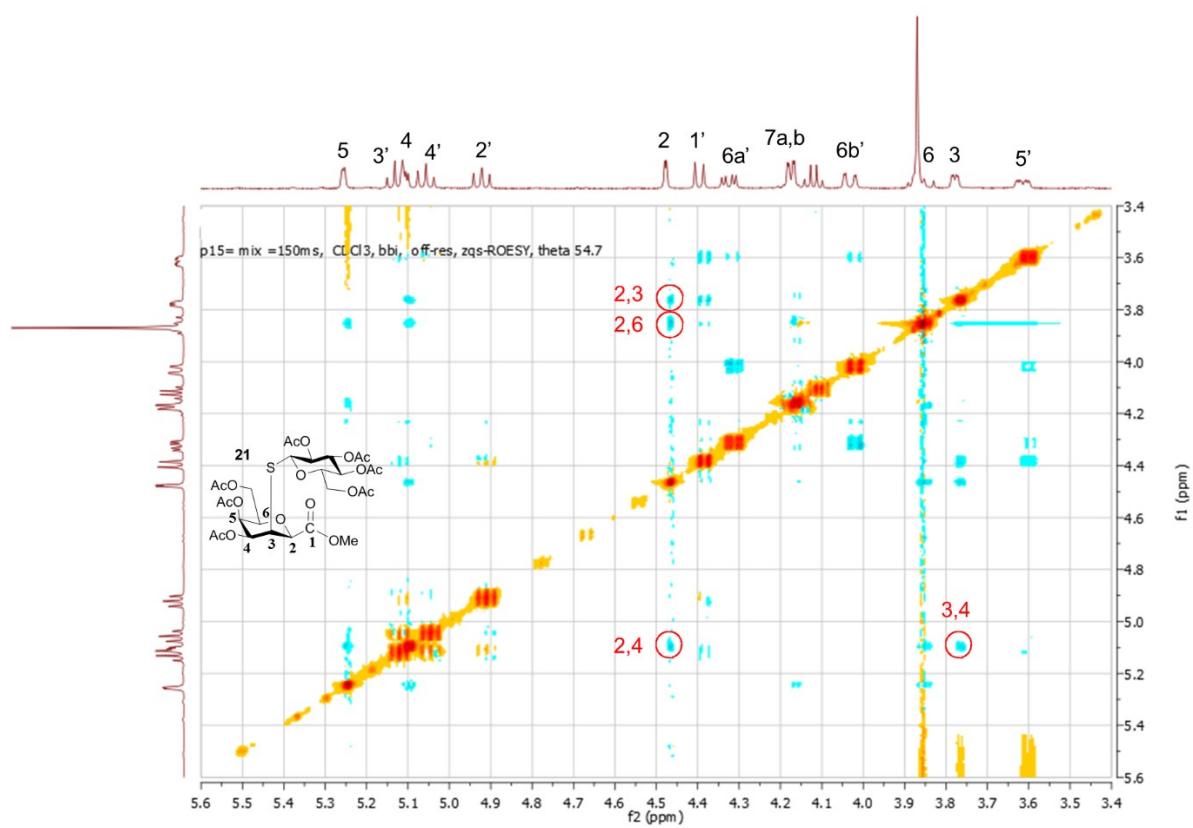

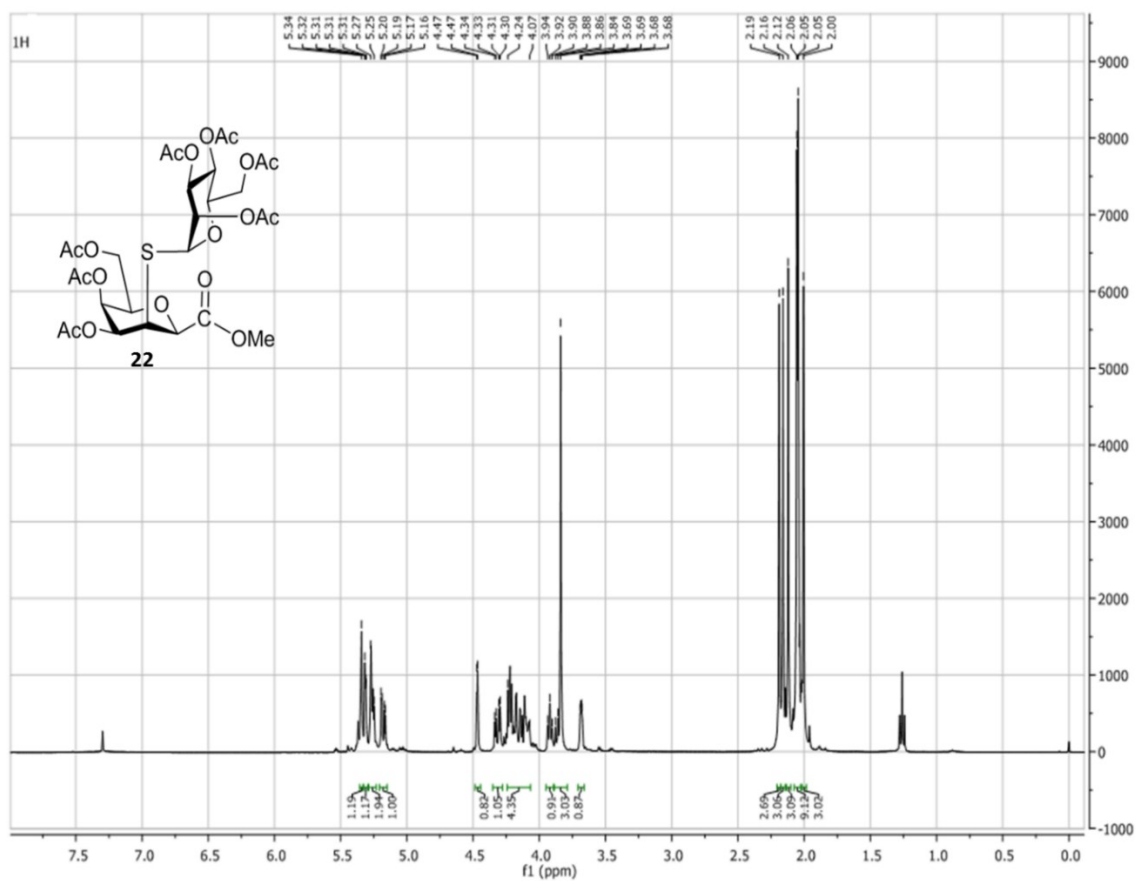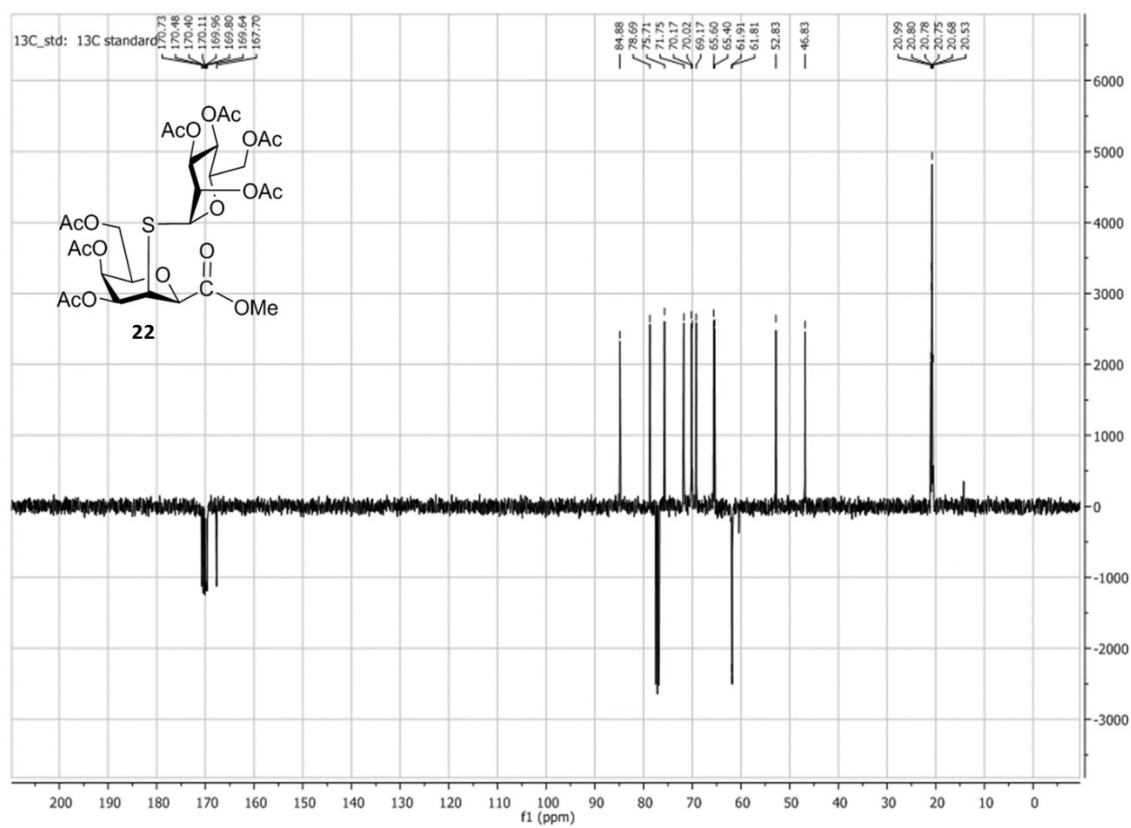

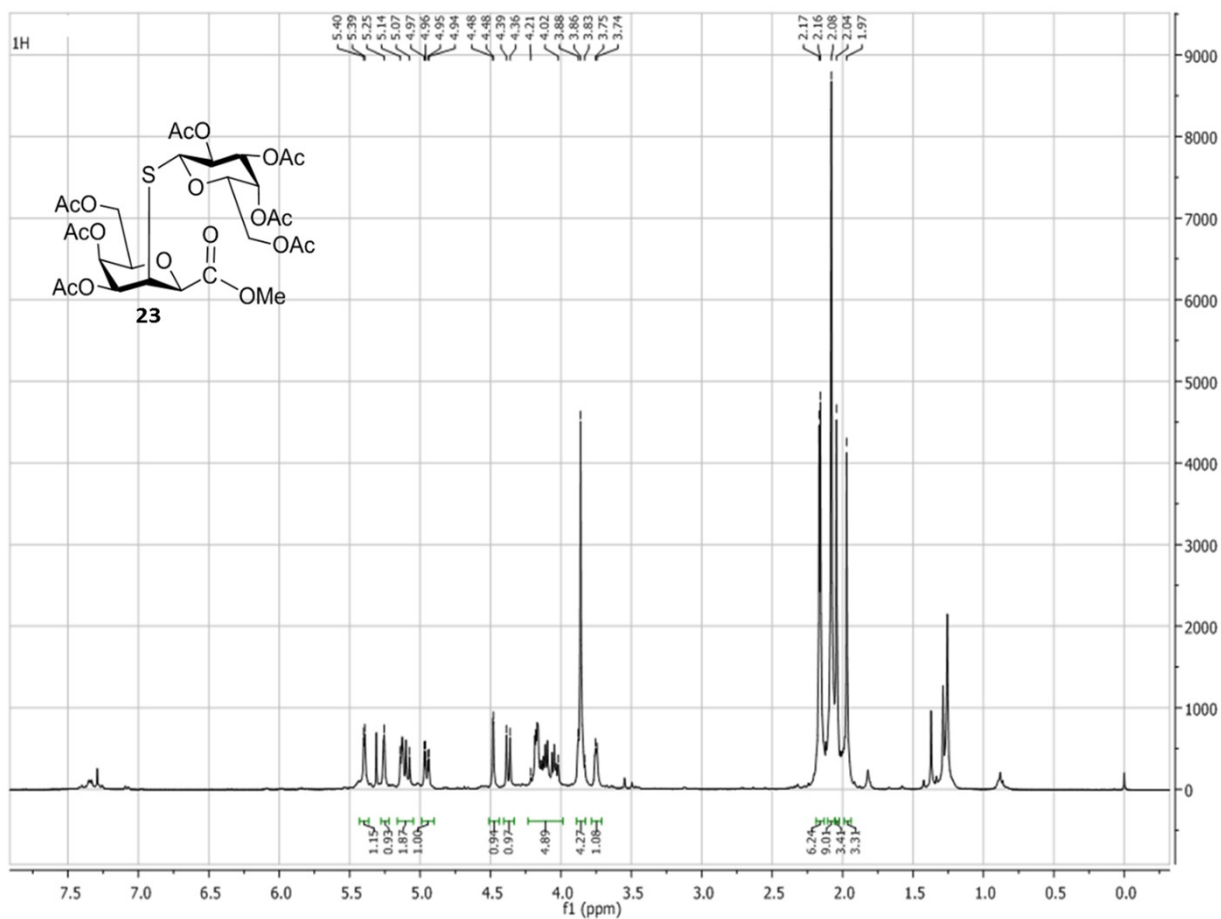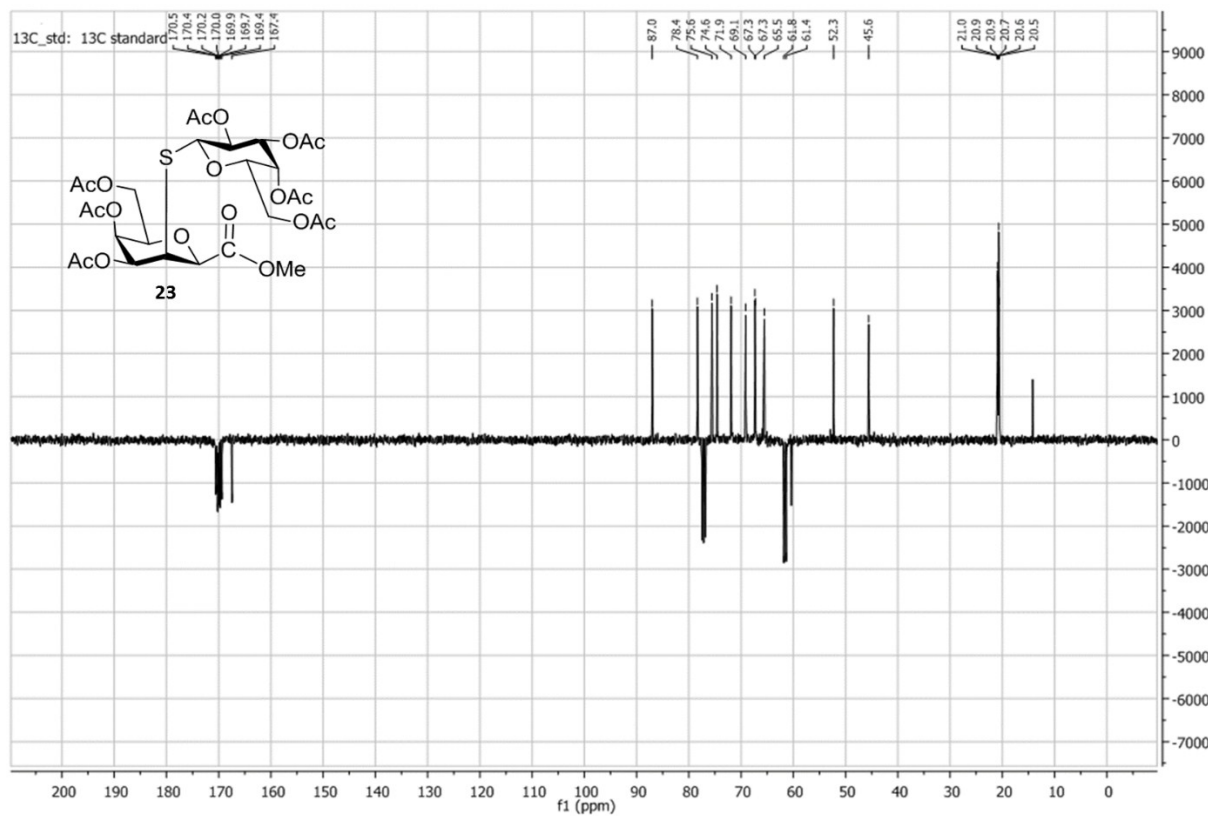

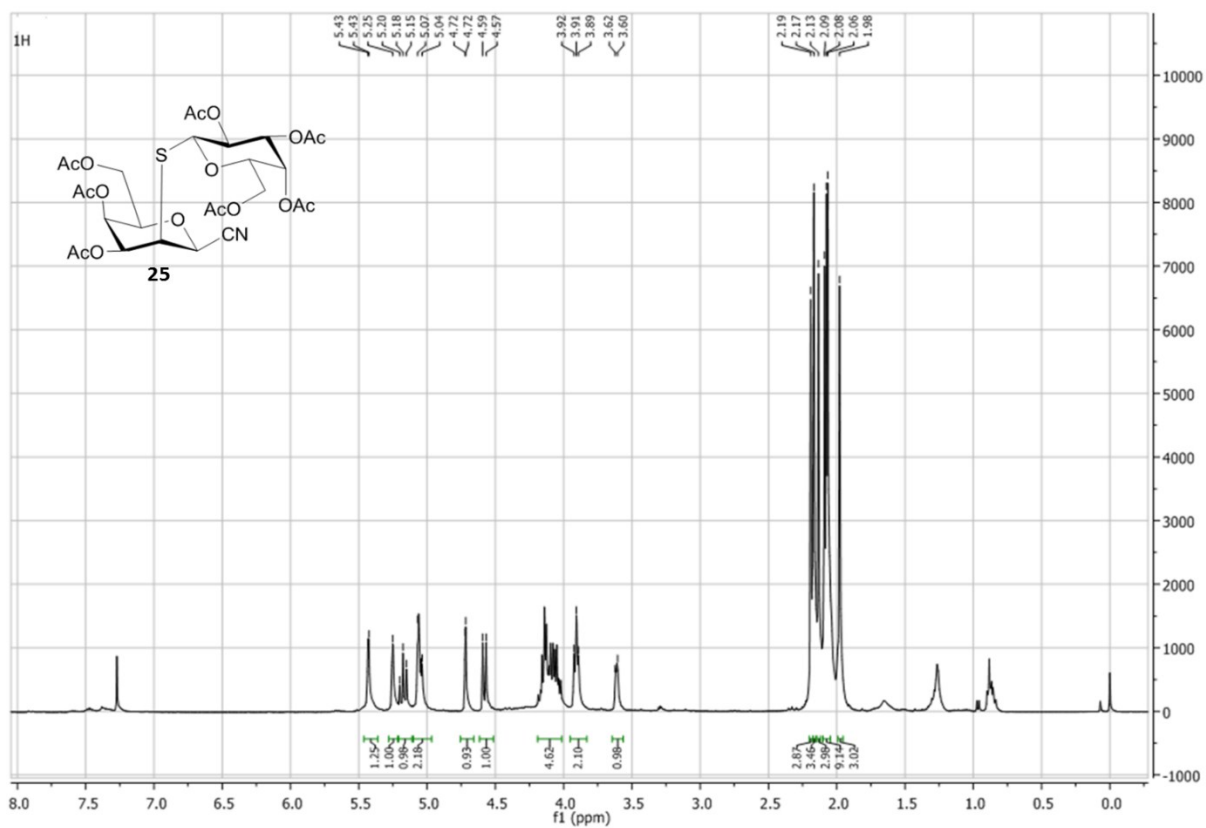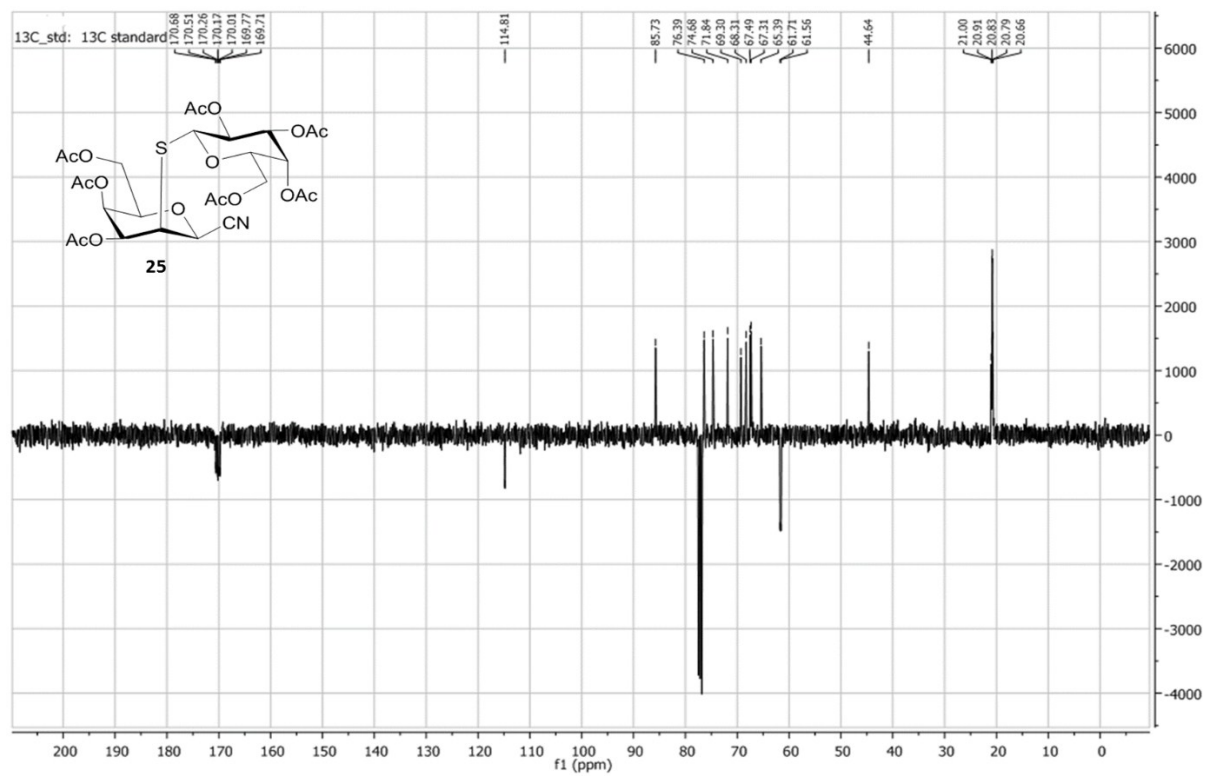

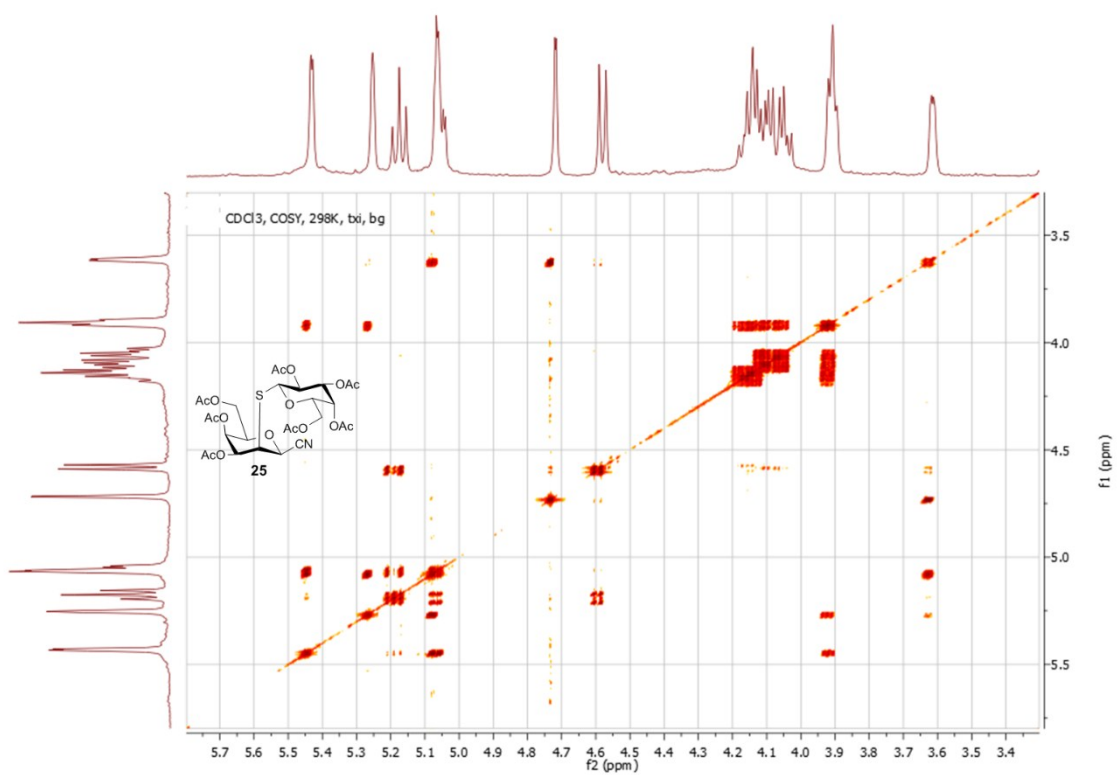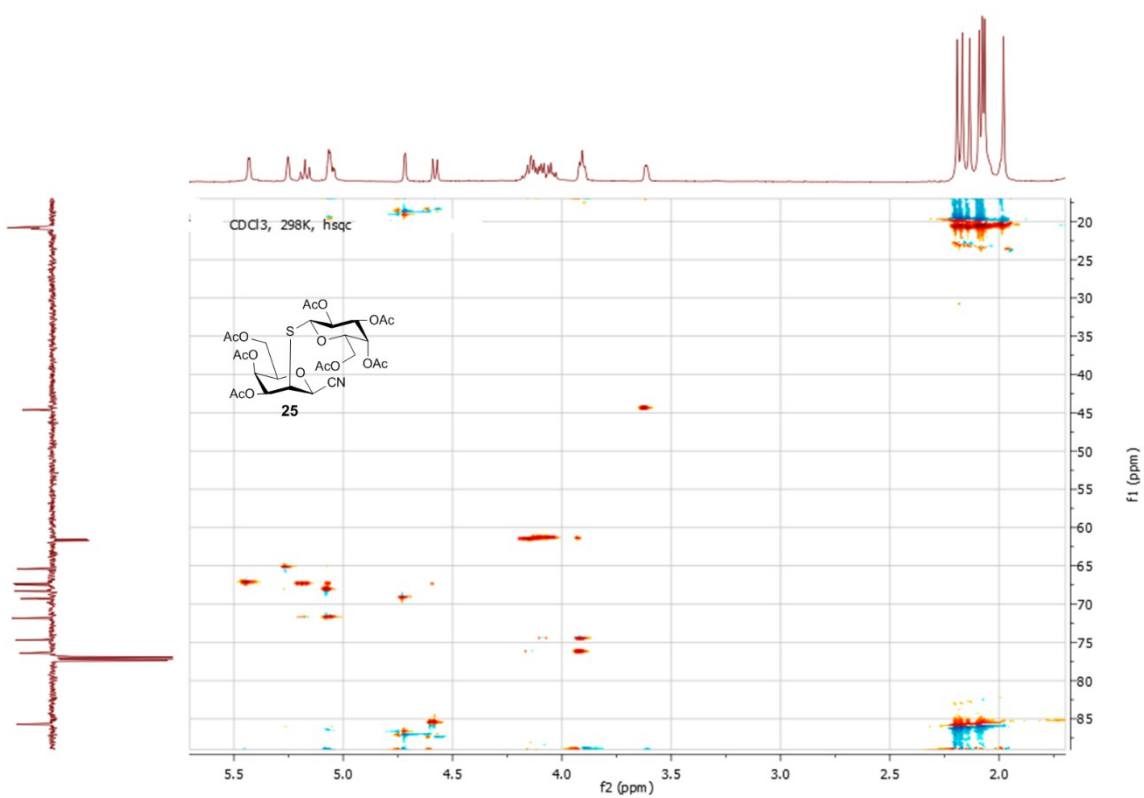

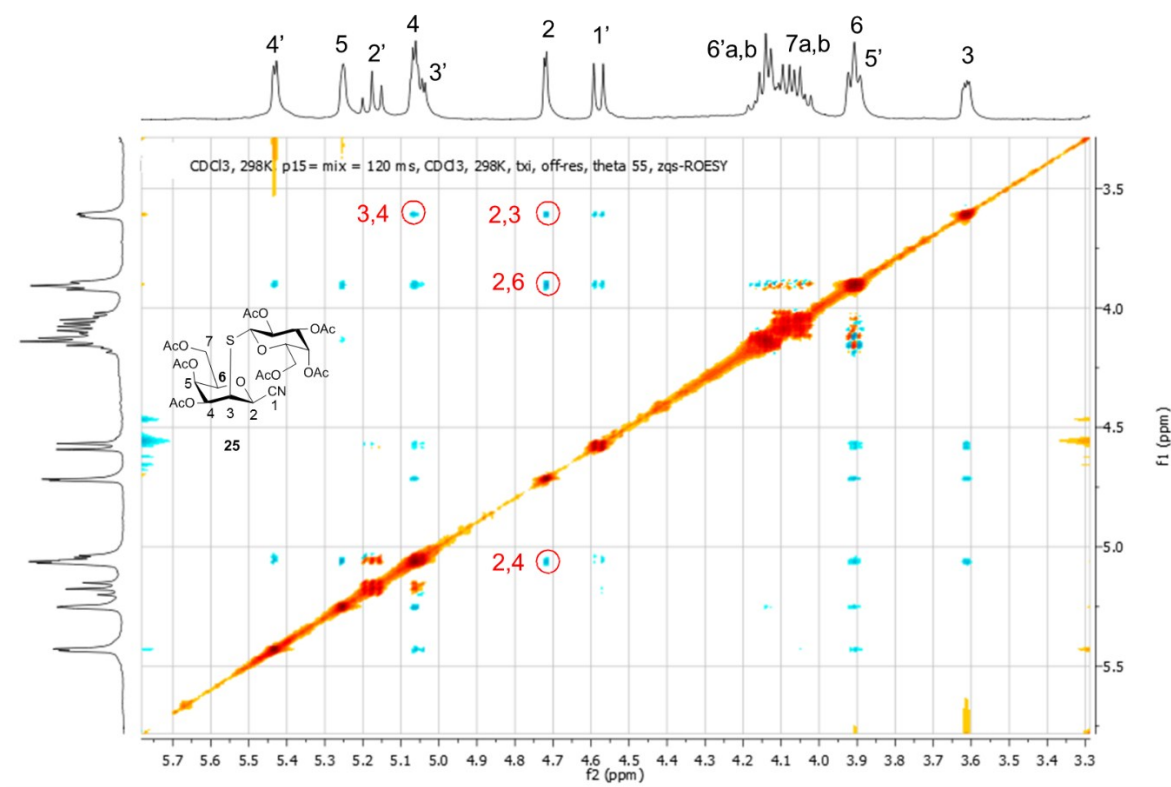

Supplement: c6nj03751h1.pdf [file c6nj03751h1.pdf]
